# Supplementary material
Source: publisher figshare collection journal article supplement (https://frontiersin.figshare.com/ndownloader/files/17820641)
Supplement: Supplementary file 1 [file 17820641]

## Sheet: Abundance
pub.id	study.name	country	continent	EU_US	study.type	crop	crop.type	annual.perennial	org.grp	funct.grp	AbundRR	AbundsdRR	cvRR
bio.1	Esperschutz et al. 2007	Switzerland	Europe	Europe	Experiment Station	Wheat	Cereals	Annual	Microbe	NA	0.131	NA	NA
bio.1	Esperschutz et al. 2007	Switzerland	Europe	Europe	Experiment Station	Wheat	Cereals	Annual	Microbe	NA	0.212	NA	NA
bio.1	Esperschutz et al. 2007	Switzerland	Europe	Europe	Experiment Station	Wheat	Cereals	Annual	Microbe	NA	0.271	NA	NA
bio.1	Esperschutz et al. 2007	Switzerland	Europe	Europe	Experiment Station	Wheat	Cereals	Annual	Microbe	NA	0.371	NA	NA
bio.100	Ekroos et al. 2010	Finland	Europe	Europe	On Farm	Cereals	Cereals	Annual	Arth	Enemy	0.368446	0.199291	-0.169155
bio.105	Feber et al. 1998	UK	Europe	Europe	On Farm	Wheat	Cereals	Annual	Arth	Enemy	-0.667354	-1.03159	-0.364231
bio.106	Feber et al. 2007	UK	Europe	Europe	On Farm	Multi	NA	NA	Plant	Producer	-0.546877	NA	NA
bio.106	Feber et al. 2007	UK	Europe	Europe	On Farm	Multi	NA	NA	Plant	Producer	0.405465	NA	NA
bio.110	Fischer et al. 2011a	Germany	Europe	Europe	On Farm	Wheat	Cereals	Annual	Vert	NA	-0.0412751	NA	NA
bio.113	Fluetsch & Sparling 1994	USA	North America	USA	On Farm	Apple	Fruits	Perennial	Vert	NA	0.846223	NA	NA
bio.116	Freemark & Kirck	Canada	North America	NA	On Farm	Multi	NA	NA	Vert	NA	0.217244	NA	NA
bio.118	Fukuda et al. 2011	New Zealand	Zealandia	NA	On Farm	Dairy	Other	NA	Arth	Decomp	-1.22526	-2.35779	-1.13253
bio.118	Fukuda et al. 2011	New Zealand	Zealandia	NA	On Farm	Dairy	Other	NA	Arth	Decomp	-0.91056	-1.27748	-0.366924
bio.118	Fukuda et al. 2011	New Zealand	Zealandia	NA	On Farm	Dairy	Other	NA	Arth	Herbivore	-0.441833	-0.677082	-0.235249
bio.118	Fukuda et al. 2011	New Zealand	Zealandia	NA	On Farm	Dairy	Other	NA	Arth	Enemy	0.604954	0.567492	-0.0374626
bio.118	Fukuda et al. 2011	New Zealand	Zealandia	NA	On Farm	Dairy	Other	NA	Arth	Herbivore	0.721496	1.59784	0.876345
bio.118	Fukuda et al. 2011	New Zealand	Zealandia	NA	On Farm	Dairy	Other	NA	Arth	Enemy	0.975309	2.20109	1.22578
bio.121	Gabriel et al. 2006	Germany	Europe	Europe	On Farm	Wheat	Cereals	Annual	Plant	Producer	0.721568	NA	NA
bio.125	Gaiger and Samways 2014	South Africa	Africa	NA	On Farm	Grapes	Fruits	Perennial	Arth	Enemy	0.22588	-0.565314	-0.791193
bio.129	Ge et al. 2013	China	Asia	NA	Experiment Station	Multi	Vegetables	Annual	Microbe	NA	0.979	NA	NA
bio.129	Ge et al. 2013	China	Asia	NA	Experiment Station	Multi	Vegetables	Annual	Microbe	NA	1.06	NA	NA
bio.13	Armstrong 1995	UK	Europe	Europe	On Farm	Potato	Root	Annual	Arth	Enemy	-0.496108	-0.59164	-0.095532
bio.139	Glenn et al 2015	USA	North America	USA	Experiment Station	Apple	Fruits	Perennial	Microbe	NA	0.258307	NA	NA
bio.155	Heinze et al. 2010	Germany	Europe	Europe	Experiment Station	Multi	NA	NA	Microbe	NA	-0.15	NA	NA
bio.155	Heinze et al. 2010	Germany	Europe	Europe	Experiment Station	Multi	NA	NA	Microbe	NA	-0.073	NA	NA
bio.155	Heinze et al. 2010	Germany	Europe	Europe	Experiment Station	Multi	NA	NA	Microbe	NA	-0.058	NA	NA
bio.155	Heinze et al. 2010	Germany	Europe	Europe	Experiment Station	Multi	NA	NA	Microbe	NA	0.019	NA	NA
bio.155	Heinze et al. 2010	Germany	Europe	Europe	Experiment Station	Multi	NA	NA	Microbe	NA	0.091	NA	NA
bio.155	Heinze et al. 2010	Germany	Europe	Europe	Experiment Station	Multi	NA	NA	Microbe	NA	0.091	NA	NA
bio.155	Heinze et al. 2010	Germany	Europe	Europe	Experiment Station	Multi	NA	NA	Microbe	NA	0.105	NA	NA
bio.155	Heinze et al. 2010	Germany	Europe	Europe	Experiment Station	Multi	NA	NA	Microbe	NA	0.154	NA	NA
bio.156	Helenius 1990	Finland	Europe	Europe	Experiment Station	Barley	Cereals	Annual	Arth	Herbivore	-1.50657	-1.90424	-0.397669
bio.156	Helenius 1990	Finland	Europe	Europe	Experiment Station	Barley	Cereals	Annual	Arth	Enemy	-0.281251	NA	NA
bio.156	Helenius 1990	Finland	Europe	Europe	Experiment Station	Barley	Cereals	Annual	Arth	Decomp	0.556572	0.57089	0.0143182
bio.159	Hesler et al. 1993	USA	North America	USA	On Farm	Rice	Cereals	Annual	Arth	Enemy	0.132172	-0.253608	-0.38578
bio.160	Hokkanen & Holopainen 1986	Germany	Europe	Europe	On Farm	Cabbage	Vegetables	Annual	Arth	Enemy	0.772312	-0.269129	-1.04144
bio.160	Hokkanen & Holopainen 1986	Germany	Europe	Europe	On Farm	Cabbage	Vegetables	Annual	Arth	Herbivore	0.955815	1.47792	0.522109
bio.163	Holzschuh et al. 2007	Germany	Europe	Europe	On Farm	Wheat	Cereals	Annual	Arth	Pollinator	2.09789	1.23356	-0.864328
bio.164	Hutton & Giller 2003	Ireland	Europe	Europe	On Farm	Grass	Forage	Annual/perennial	Arth	Decomp	0.146521	NA	NA
bio.165	Hyvonen et al. 2003	Finland	Europe	Europe	On Farm	Cereals	Cereals	Annual	Plant	Producer	0.228012	NA	NA
bio.170	Isaia et al 2006	Italy	Europe	Europe	On Farm	Grapes	Fruits	Perennial	Microbe	Enemy	0.449883	NA	NA
bio.173	Jaffee et al 1998	USA	North America	USA	Experiment Station	Multi	Other	Annual	NA	NA	-0.170073	0.0744665	0.244539
bio.173	Jaffee et al 1998	USA	North America	USA	Experiment Station	Multi	Other	Annual	Microbe	Enemy	-0.125397	-0.248116	-0.12272
bio.174	Jaffuel et al 2016	Switzerland	Europe	Europe	On Farm	Cereals	Cereals	Annual	NA	NA	0.510826	0.405465	-0.105361
bio.174	Jaffuel et al 2016	Switzerland	Europe	Europe	On Farm	Cereals	Cereals	Annual	NA	NA	0.693147	0	-0.693147
bio.179	Jonason et al. 2013	Sweden	Europe	Europe	On Farm	Cereals	Cereals	Annual	Arth	Enemy	0.277914	0.0406041	-0.23731
bio.188	Karlsson et al 2017	Sweden	Europe	Europe	On Farm	Wheat	Cereals	Annual	Microbe	NA	0.0726314	0.349986	0.277355
bio.188	Karlsson et al 2017	Sweden	Europe	Europe	On Farm	Wheat	Cereals	Annual	Plant	Producer	0.980829	NA	NA
bio.193	Kirk and Lindsay 2017	Canada	North America	NA	On Farm	Cereals	Cereals	Annual	Vert	NA	0.0689929	0.405465	0.336472
bio.199	Kremen et al. 2004	USA	North America	USA	On Farm	Watermelon	Vegetables	Annual	Arth	Pollinator	0.94051	1.44991	0.5094
bio.199	Kremen et al. 2004	USA	North America	USA	On Farm	Watermelon	Vegetables	Annual	Arth	Pollinator	1.07383	0.926927	-0.146905
bio.203	Lagomarsino et al. 2009	Italy	Europe	Europe	Experiment Station	NA	NA	Annual	Microbe	NA	-0.987	NA	NA
bio.203	Lagomarsino et al. 2009	Italy	Europe	Europe	Experiment Station	NA	NA	Annual	Microbe	NA	-0.965	NA	NA
bio.203	Lagomarsino et al. 2009	Italy	Europe	Europe	Experiment Station	NA	NA	Annual	Microbe	NA	0.04	NA	NA
bio.205	Larsen et al. 2014	USA	North America	USA	Experiment Station	Cereals	Cereals	Annual	Microbe	NA	-0.284	NA	NA
bio.205	Larsen et al. 2014	USA	North America	USA	Experiment Station	Cereals	Cereals	Annual	Microbe	NA	0.25	NA	NA
bio.205	Larsen et al. 2014	USA	North America	USA	Experiment Station	Cereals	Cereals	Annual	Microbe	NA	0.505	NA	NA
bio.205	Larsen et al. 2014	USA	North America	USA	Experiment Station	Cereals	Cereals	Annual	Microbe	NA	1.001	NA	NA
bio.205	Larsen et al. 2014	USA	North America	USA	Experiment Station	Cereals	Cereals	Annual	Microbe	NA	1.001	NA	NA
bio.205	Larsen et al. 2014	USA	North America	USA	Experiment Station	Cereals	Cereals	Annual	Microbe	NA	1.039	NA	NA
bio.205	Larsen et al. 2014	USA	North America	USA	Experiment Station	Cereals	Cereals	Annual	Microbe	NA	1.452	NA	NA
bio.205	Larsen et al. 2014	USA	North America	USA	Experiment Station	Cereals	Cereals	Annual	Microbe	NA	2.047	NA	NA
bio.21	Batary et al. 2012	Germany	Europe	Europe	On Farm	Wheat	Cereals	Annual	Arth	Enemy	0.942462	0.751067	-0.191395
bio.229	Reganold et al. 2010	USA	North America	USA	On Farm	Strawberry	Fruits	Perennial	Microbe	NA	0.151	NA	NA
bio.229	Mallinger et al 2015	USA	North America	USA	On Farm	Apple	Fruits	Perennial	Arth	Pollinator	0.154151	-0.0105821	-0.164733
bio.229	Reganold et al. 2010	USA	North America	USA	On Farm	Strawberry	Fruits	Perennial	Microbe	NA	0.288	NA	NA
bio.229	Reganold et al. 2010	USA	North America	USA	On Farm	Strawberry	Fruits	Perennial	Microbe	NA	0.753	NA	NA
bio.235	Martin et al. 2016	South Korea	Asia	NA	On Farm	Potato	Root	Annual	Arth	Enemy	-0.263032	-0.726499	-0.463467
bio.235	Martin et al. 2016	South Korea	Asia	NA	On Farm	Rice	Cereals	Annual	Arth	Enemy	0.236812	-0.0421344	-0.278946
bio.235	Martin et al. 2016	South Korea	Asia	NA	On Farm	Soybean	Oil crops	Annual	Arth	Enemy	0.446759	1.11763	0.670874
bio.235	Martin et al. 2016	South Korea	Asia	NA	On Farm	Radish	Vegetables	Annual	Arth	Enemy	0.496171	0.649586	0.153415
bio.24	Bates & Harris 2009	UK	Europe	Europe	On Farm	Multi	NA	NA	Vert	NA	0.0167135	NA	NA
bio.241	Menalled et al 2001	USA	North America	USA	Experiment Station	Cereals	Cereals	Annual	Plant	Producer	1.78551	0.778445	-1.00707
bio.250	Morandin and Winston 2005	Canada	North America	NA	On Farm	Canola	Oil crops	Annual	Arth	Pollinator	0.396731	-0.0277796	-0.424511
bio.251	Moreby et al. 1994	UK	Europe	Europe	On Farm	Wheat	Cereals	Annual	Arth	Enemy	-0.336472	NA	NA
bio.251	Moreby et al. 1994	UK	Europe	Europe	On Farm	Wheat	Cereals	Annual	Arth	NA	0.129048	NA	NA
bio.258	Neher 1999	USA	North America	USA	On Farm	Multi	NA	NA	NA	NA	-0.0621318	NA	NA
bio.258	Neher 1999	USA	North America	USA	On Farm	Multi	NA	NA	NA	NA	0.0289875	NA	NA
bio.258	Neher 1999	USA	North America	USA	On Farm	Multi	NA	NA	NA	NA	0.149296	NA	NA
bio.258	Neher 1999	USA	North America	USA	On Farm	Multi	NA	NA	NA	Herbivore	0.288654	NA	NA
bio.258	Neher 1999	USA	North America	USA	On Farm	Multi	NA	NA	NA	Enemy	0.888048	NA	NA
bio.259	Nesper et al 2017	India	Asia	NA	On Farm	Coffee	Beverage	Perennial	Plant	Producer	-0.699073	-1.78489	-1.08582
bio.26	Beecher et al. 2002	USA	North America	USA	On Farm	Corn	Cereals	Annual	Vert	NA	0.910416	NA	NA
bio.260	Oberg 2007	Sweden	Europe	Europe	On Farm	Cereals	Cereals	Annual	Arth	Enemy	0.282292	0.781064	0.498772
bio.262	Oehl et al 2004	Switzerland	Europe	Europe	On Farm	NA	Other	Annual	Microbe	NA	0.223144	NA	NA
bio.263	Ohwaki 2015	Japan	Asia	NA	On Farm	Rice	Cereals	Annual	Arth	Enemy	-0.382992	-0.600774	-0.217782
bio.263	Ohwaki 2015	Japan	Asia	NA	On Farm	Rice	Cereals	Annual	Arth	Enemy	-0.182322	0.356675	0.538997
bio.263	Ohwaki 2015	Japan	Asia	NA	On Farm	Rice	Cereals	Annual	Arth	Enemy	-0.17185	0.214148	0.385998
bio.263	Ohwaki 2015	Japan	Asia	NA	On Farm	Rice	Cereals	Annual	Arth	NA	0.103184	0.318782	0.215598
bio.263	Ohwaki 2015	Japan	Asia	NA	On Farm	Rice	Cereals	Annual	Arth	Enemy	0.470004	-0.693147	-1.16315
bio.263	Ohwaki 2015	Japan	Asia	NA	On Farm	Rice	Cereals	Annual	Arth	Enemy	0.510826	0.229574	-0.281251
bio.265	Ondine et al. 2009	France	Europe	Europe	On Farm	Cereals	Cereals	Annual	Vert	NA	0.103951	NA	NA
bio.270	Pelosi et al. 2009	France	Europe	Europe	Experiment Station	Wheat	Cereals	Annual	NA	Decomp	-0.0200007	NA	NA
bio.271	Pelosi et al 2013	France	Europe	Europe	On Farm	Wheat	Cereals	Annual	NA	Decomp	1.19965	3.92287	2.72322
bio.272	Perez et al 2014	China	Asia	NA	Experiment Station	NA	Vegetables	Annual	Microbe	NA	0.571132	0	-0.571132
bio.273	Pershina et al 2015	Finland	Europe	Europe	Experiment Station	Grass	Forage	Annual/perennial	Microbe	NA	0.623187	NA	NA
bio.278	Pfiffner & Mader 1997	Switzerland	Europe	Europe	Experiment Station	Potato	Root	Annual	NA	Decomp	0.462305	NA	NA
bio.278	Pfiffner & Mader 1997	Switzerland	Europe	Europe	Experiment Station	Beetroot	Root	Annual	NA	Decomp	0.482804	NA	NA
bio.278	Pfiffner & Mader 1997	Switzerland	Europe	Europe	Experiment Station	Wheat	Cereals	Annual	NA	Decomp	0.882113	NA	NA
bio.279	Pfiffner & Niggli 1996	Switzerland	Europe	Europe	Experiment Station	Wheat	Cereals	Annual	Arth	Enemy	0.629142	NA	NA
bio.28	Benargama et al 2016	Canada	North America	NA	Experiment Station	Alfalfa	Forage	Annual/perennial	Plant	Producer	1.03609	1.09861	0.0625204
bio.28	Benargama et al 2016	Canada	North America	NA	Experiment Station	Cereals	Other	Annual	Plant	Producer	1.07614	1.32176	0.245616
bio.28	Benargama et al 2016	Canada	North America	NA	Experiment Station	Wheat	Cereals	Annual	Plant	Producer	1.70475	1.96611	0.261365
bio.280	Picchi et al. 2016	Italy	Europe	Europe	On Farm	Olive	Oil crops	Perennial	Arth	NA	0.180614	0.0626986	-0.117915
bio.280	Picchi et al. 2016	Italy	Europe	Europe	On Farm	Olive	Oil crops	Perennial	Arth	Enemy	0.314249	0.213116	-0.101133
bio.282	Pocock & Jennings 2008	UK	Europe	Europe	On Farm	Cereals	Cereals	Annual	Vert	Enemy	-0.384142	NA	NA
bio.282	Pocock & Jennings 2008	UK	Europe	Europe	On Farm	Cereals	Cereals	Annual	Arth	NA	-0.0916113	NA	NA
bio.283	Pokharel et al. 2015	USA	North America	USA	Experiment Station	Apple	Fruits	Perennial	NA	Enemy	0.13815	NA	NA
bio.283	Pokharel et al. 2015	USA	North America	USA	Experiment Station	Apple	Fruits	Perennial	NA	NA	0.710242	NA	NA
bio.283	Pokharel et al. 2015	USA	North America	USA	Experiment Station	Apple	Fruits	Perennial	NA	Herbivore	1.09861	NA	NA
bio.283	Pokharel et al. 2015	USA	North America	USA	Experiment Station	Peach	Fruits	Perennial	NA	NA	1.1216	0.340859	-0.780743
bio.283	Pokharel et al. 2015	USA	North America	USA	Experiment Station	Peach	Fruits	Perennial	NA	Enemy	1.64223	0.724757	-0.917471
bio.283	Pokharel et al. 2015	USA	North America	USA	Experiment Station	Peach	Fruits	Perennial	NA	Herbivore	2.25129	1.84103	-0.410261
bio.285	Ponce et al. 2011	Spain	Europe	Europe	On Farm	Barley	Cereals	Annual	Arth	Herbivore	-0.0477682	-0.133981	-0.0862128
bio.285	Ponce et al. 2011	Spain	Europe	Europe	On Farm	Barley	Cereals	Annual	Arth	Enemy	0.447132	1.01117	0.564036
bio.285	Ponce et al. 2011	Spain	Europe	Europe	On Farm	Wheat	Cereals	Annual	Arth	Enemy	0.500047	1.08182	0.581772
bio.285	Ponce et al. 2011	Spain	Europe	Europe	On Farm	Barley	Cereals	Annual	Arth	Decomp	0.555237	0.767034	0.211797
bio.285	Ponce et al. 2011	Spain	Europe	Europe	On Farm	Wheat	Cereals	Annual	Arth	Decomp	0.859789	1.47842	0.618627
bio.285	Ponce et al. 2011	Spain	Europe	Europe	On Farm	Wheat	Cereals	Annual	Arth	Herbivore	0.901788	1.22141	0.319623
bio.288	Power & Stout 2011	Ireland	Europe	Europe	On Farm	Dairy	Other	NA	Arth	Pollinator	0.249216	0.195745	-0.0534712
bio.288	Power & Stout 2011	Ireland	Europe	Europe	On Farm	Dairy	Other	NA	Plant	Producer	1.25276	NA	NA
bio.29	Benargama et al 2016b	Canada	North America	NA	Experiment Station	Wheat	Cereals	Annual	Plant	Producer	0.578152	-0.324755	-0.902907
bio.293	Purtauf et al. 2005	Germany	Europe	Europe	On Farm	Wheat	Cereals	Annual	Arth	Enemy	0.487034	NA	NA
bio.296	Ramirez et al. 2009	USA	North America	USA	On Farm	Potato	Root	Annual	NA	Herbivore	-0.606136	NA	NA
bio.298	Reddersen 1997	Denmark	Europe	Europe	On Farm	Cereals	Cereals	Annual	Arth	NA	-0.919625	NA	NA
bio.3	Adams et al 2017	USA	North America	USA	Experiment Station	Soybean	Oil crops	Annual	Arth	Pollinator	-1.60944	NA	NA
bio.3	Adams et al 2017	USA	North America	USA	Experiment Station	Soybean	Oil crops	Annual	Arth	Enemy	-0.517257	NA	NA
bio.3	Adams et al 2017	USA	North America	USA	Experiment Station	Corn	Cereals	Annual	Arth	Decomp	-0.336472	NA	NA
bio.3	Adams et al 2017	USA	North America	USA	Experiment Station	Soybean	Oil crops	Annual	Arth	Enemy	-0.231512	NA	NA
bio.3	Adams et al 2017	USA	North America	USA	Experiment Station	Corn	Cereals	Annual	Arth	Enemy	-0.0717879	NA	NA
bio.3	Adams et al 2017	USA	North America	USA	Experiment Station	Soybean	Oil crops	Annual	Arth	Herbivore	0.0981179	NA	NA
bio.3	Adams et al 2017	USA	North America	USA	Experiment Station	Soybean	Oil crops	Annual	Arth	Decomp	0.336902	NA	NA
bio.3	Adams et al 2017	USA	North America	USA	Experiment Station	Corn	Cereals	Annual	Arth	Herbivore	0.347196	NA	NA
bio.3	Adams et al 2017	USA	North America	USA	Experiment Station	Corn	Cereals	Annual	Arth	Enemy	1.40982	NA	NA
bio.301	Reilly et al. 2015	Ireland	Europe	Europe	Experiment Station	Onion	Vegetables	Annual	NA	NA	0.475627	-0.318454	-0.794081
bio.301	Reilly et al. 2016	Ireland	Europe	Europe	Experiment Station	Onion	Vegetables	Annual	Microbe	NA	0.49283	0.500775	0.00794501
bio.301	Reilly et al. 2014	Ireland	Europe	Europe	Experiment Station	Onion	Vegetables	Annual	Microbe	NA	1.52515	2.0149	0.489748
bio.301	Reilly et al. 2013	Ireland	Europe	Europe	Experiment Station	Onion	Vegetables	Annual	Microbe	NA	2.20232	1.8718	-0.330518
bio.302	Rizo-Patron et al. 2013	Costa Rica	North America	NA	On Farm	Rice	Cereals	Annual	NA	NA	-1.80332	NA	NA
bio.302	Rizo-Patron et al. 2013	Costa Rica	North America	NA	On Farm	Rice	Cereals	Annual	Arth	NA	0.727183	NA	NA
bio.303	Romaniuk et al. 2011	Argentina	South America	NA	On Farm	Multi	Multi	Annual	Microbe	NA	0.441833	-0.154151	-0.595983
bio.303	Romaniuk et al. 2011	Argentina	South America	NA	On Farm	Multi	Multi	Annual	Microbe	NA	1.8563	0	-1.8563
bio.304	Romero et al. 2008	Spain	Europe	Europe	On Farm	Cereals	Cereals	Annual	Plant	Producer	0.828183	NA	NA
bio.305	Roschewitz et al. 2005	Germany	Europe	Europe	On Farm	Wheat	Cereals	Annual	Plant	Producer	0.151685	NA	NA
bio.305	Roschewitz et al. 2005	Germany	Europe	Europe	On Farm	Wheat	Cereals	Annual	Plant	Producer	0.41198	NA	NA
bio.306	Rotches-Ribalta et al. 2016	Switzerland	Europe	Europe	Experiment Station	Multi	Multi	Annual/perennial	Plant	NA	1.16315	1.16315	0
bio.308	Rundlof et al. 2010	Sweden	Europe	Europe	On Farm	Cereals	Cereals	Annual	Plant	Producer	0.444871	NA	NA
bio.31	Bernard et al 2012	USA	North America	USA	NA	Potato	Root	Annual	Microbe	NA	-0.0118582	NA	NA
bio.313	Sahraoui et al. 2015	Tunisia	Africa	NA	On Farm	Cirtus	Fruits	Perennial	Arth	Enemy	0.0010005	NA	NA
bio.316	Sanchez-Moreno et al. 2009	USA	North America	USA	Experiment Station	Multi	NA	Annual	NA	NA	0.412707	0.317598	-0.0951094
bio.317	Schmidt et al. 2005	Germany	Europe	Europe	On Farm	Wheat	Cereals	Annual	Arth	Enemy	0.482252	NA	NA
bio.319	Schneider et al. 2015	Canada	North America	NA	On Farm	Multi	Other	Annual	Microbe	NA	-0.440867	0	0.440867
bio.319	Schneider et al. 2015	Canada	North America	NA	On Farm	Multi	Other	Annual	Microbe	NA	-0.219054	0	0.219054
bio.319	Schneider et al. 2015	Canada	North America	NA	On Farm	Multi	Other	Annual	Microbe	NA	0.0363676	0	-0.0363676
bio.319	Schneider et al. 2015	Canada	North America	NA	On Farm	Multi	Other	Annual	Microbe	NA	0.0882926	0	-0.0882926
bio.319	Schneider et al. 2015	Canada	North America	NA	On Farm	Multi	Other	Annual	Microbe	NA	0.320908	0	-0.320908
bio.32	Berry et al. 1996	New Zealand	Zealandia	NA	On Farm	Carrot	Vegetables	Annual	Arth	Enemy	0.246251	NA	NA
bio.320	Schon et al. 2011	New Zealand	Zealandia	NA	Experiment Station	Grass	Other	NA	NA	NA	-0.216223	0.281547	0.49777
bio.320	Schon et al. 2011	New Zealand	Zealandia	NA	Experiment Station	Grass	Other	NA	NA	NA	0.0822381	-0.707641	-0.789879
bio.320	Schon et al. 2011	New Zealand	Zealandia	NA	Experiment Station	Grass	Other	NA	Arth	NA	0.24686	NA	NA
bio.320	Schon et al. 2011	New Zealand	Zealandia	NA	Experiment Station	Grass	Other	NA	Arth	NA	0.863965	0.222343	-0.641622
bio.328	Somavilla et al. 2016	Brazil	South America	NA	Experiment Station	Guarana	Beverage	Perennial	Arth	Enemy	0.859011	NA	NA
bio.331	Stagnari et al. 2015	Italy	Europe	Europe	Experiment Station	Multi	Multi	Annual	Microbe	NA	-1.91239	NA	NA
bio.331	Stagnari et al. 2015	Italy	Europe	Europe	Experiment Station	Multi	Multi	Annual	Microbe	NA	-0.167054	NA	NA
bio.332	Stark et al. 2008	New Zealand	Zealandia	NA	Experiment Station	Lupin	Pulses	Annual	Microbe	NA	-0.217	NA	NA
bio.332	Stark et al. 2008	New Zealand	Zealandia	NA	Experiment Station	Lupin	Pulses	Annual	Microbe	NA	0.088	NA	NA
bio.332	Stark et al. 2008	New Zealand	Zealandia	NA	Experiment Station	Lupin	Pulses	Annual	Microbe	NA	0.19	NA	NA
bio.332	Stark et al. 2008	New Zealand	Zealandia	NA	Experiment Station	Lupin	Pulses	Annual	Microbe	NA	0.477	NA	NA
bio.34	Birkhofer et al 2008	Switzerland	Europe	Europe	Experiment Station	Grass	Forage	Annual/perennial	Arth	Enemy	0.066454	NA	NA
bio.340	Toffoli & Rughetti 2017	Italy	Europe	Europe	On Farm	Rice	Cereals	Annual	Vert	Enemy	0.875469	NA	NA
bio.347	Van Diepeningen et al. 2006a	The Netherlands	Europe	Europe	On Farm	NA	NA	NA	NA	NA	-0.00514862	-0.463162	-0.458013
bio.351	Velmourougane 2016	India	Asia	NA	Experiment Station	Coffee	Beverage	Perennial	Arth	NA	0.127833	0	-0.127833
bio.351	Velmourougane 2016	India	Asia	NA	Experiment Station	Coffee	Beverage	Perennial	Microbe	NA	0.272507	0	-0.272507
bio.351	Velmourougane 2016	India	Asia	NA	Experiment Station	Coffee	Beverage	Perennial	Arth	NA	0.37711	0	-0.37711
bio.355	Vesely & Sarapatka 2008	Czech Republic	Europe	Europe	Experiment Station	Barley	Cereals	Annual	Arth	Enemy	-0.183447	-2.4248	-2.24136
bio.355	Vesely & Sarapatka 2008	Czech Republic	Europe	Europe	Experiment Station	Barley	Cereals	Annual	Arth	Enemy	0.247257	0.99923	0.751973
bio.355	Vesely & Sarapatka 2008	Czech Republic	Europe	Europe	Experiment Station	Wheat	Cereals	Annual	Arth	Enemy	0.519022	-0.898272	-1.41729
bio.356	Wander et al. 1995	USA	North America	USA	Experiment Station	Corn	Cereals	Annual	Microbe	NA	0.092	NA	NA
bio.356	Wander et al. 1995	USA	North America	USA	Experiment Station	Corn	Cereals	Annual	Microbe	NA	0.155	NA	NA
bio.356	Wander et al. 1995	USA	North America	USA	Experiment Station	Corn	Cereals	Annual	Microbe	NA	0.238	NA	NA
bio.356	Wander et al. 1995	USA	North America	USA	Experiment Station	Corn	Cereals	Annual	Microbe	NA	0.445	NA	NA
bio.360	Wang et al. 2017b	USA	North America	USA	On Farm	NA	NA	NA	Microbe	NA	0.0923733	0	-0.0923733
bio.362	Weibull et al. 2000	Sweden	Europe	Europe	On Farm	Cereals	Cereals	Annual	Arth	Pollinator	-0.103726	-0.397145	-0.293419
bio.363	Wickramasinghe et al. 2004	UK	Europe	Europe	On Farm	Grass	Forage	Annual/perennial	Arth	NA	0.515042	NA	NA
bio.364	Wickramasinghe et al. 2003	UK	Europe	Europe	On Farm	NA	Vegetables	NA	Vert	NA	0.210565	NA	NA
bio.364	Wickramasinghe et al. 2003	UK	Europe	Europe	On Farm	Grass	Forage	Annual/perennial	Vert	NA	0.268706	NA	NA
bio.368	Winfree et al. 2007	USA	North America	USA	On Farm	Watermelon	Vegetables	Annual	Arth	Pollinator	-0.0169165	-0.170493	-0.153577
bio.368	Winfree et al. 2007	USA	North America	USA	On Farm	Watermelon	Vegetables	Annual	Arth	Pollinator	0.182037	0.130508	-0.051529
bio.368	Winfree et al. 2007	USA	North America	USA	On Farm	Watermelon	Vegetables	Annual	Arth	Pollinator	0.223144	1.17407	0.950925
bio.368	Winfree et al. 2007	USA	North America	USA	On Farm	Watermelon	Vegetables	Annual	Arth	Pollinator	0.312031	0.841843	0.529812
bio.368	Winfree et al. 2007	USA	North America	USA	On Farm	Watermelon	Vegetables	Annual	Arth	Pollinator	0.578238	-0.618477	-1.19671
bio.369	Winfree et al. 2008	USA	North America	USA	On Farm	Pepper	Beverage	Annual	Arth	Pollinator	0.159065	0.195977	0.0369122
bio.369	Winfree et al. 2008	USA	North America	USA	On Farm	Tomato	Vegetables	Annual	Arth	Pollinator	0.169076	-0.387919	-0.556996
bio.372	Winqvist et al. 2011	Sweden	Europe	Europe	On Farm	Cereals	Cereals	Annual	Arth	Enemy	0.170572	0.0453084	-0.125264
bio.378	Danhardt et al. 2010	Sweden	Europe	Europe	On Farm	Cereals	Cereals	Annual	Vert	NA	0.215961	NA	NA
bio.382	Letourneau et al. 2015	USA	North America	USA	On Farm	Multi	Vegetables	Annual	Arth	Enemy	0.0323653	0.204565	0.172199
bio.383	Bruggisser et al. 2010	Switzerland	Europe	Europe	On Farm	Grapes	Fruits	Perennial	Arth	Enemy	-0.211456	NA	NA
bio.384	Koss et al. 2005	USA	North America	USA	On Farm	Potato	Root	Annual	Arth	Enemy	1.41099	NA	NA
bio.385	Neher & Olson 1999	USA	North America	USA	Experiment Station	Multi	NA	NA	NA	NA	-0.320782	NA	NA
bio.385	Neher & Olson 1999	USA	North America	USA	Experiment Station	Multi	NA	NA	NA	Enemy	0.243622	NA	NA
bio.385	Neher & Olson 1999	USA	North America	USA	Experiment Station	Multi	NA	NA	NA	NA	0.861441	NA	NA
bio.385	Neher & Olson 1999	USA	North America	USA	Experiment Station	Multi	NA	NA	NA	Herbivore	0.891469	NA	NA
bio.386	O'Sullivan & Gormally 2002	Ireland	Europe	Europe	On Farm	Potato	Root	Annual	Arth	Enemy	1.54648	NA	NA
bio.387	Paoletti et al. 1995	Italy	Europe	Europe	On Farm	Apple	Fruits	Perennial	Arth	Pollinator	-0.792455	NA	NA
bio.387	Paoletti et al. 1995	Italy	Europe	Europe	On Farm	Apple	Fruits	Perennial	Arth	Enemy	2.39953	NA	NA
bio.387	Paoletti et al. 1995	Italy	Europe	Europe	On Farm	Apple	Fruits	Perennial	NA	Decomp	3.1495	NA	NA
bio.388	Ruano et al. 2004	Spain	Europe	Europe	On Farm	Olive	Oil crops	Perennial	Arth	NA	1.11391	NA	NA
bio.389	Zalazar & Salvo 2007	Argentina	South America	NA	On Farm	Multi	Vegetables	Annual	Arth	NA	0.769271	NA	NA
bio.40	Bossio et al. 1998	USA	North America	USA	Experiment Station	Tomato	Vegetables	Annual	Microbe	NA	-0.099	NA	NA
bio.40	Bossio et al. 1998	USA	North America	USA	Experiment Station	Tomato	Vegetables	Annual	Microbe	NA	0.111	NA	NA
bio.45	Basedow 1998	Germany	Europe	Europe	On Farm	Wheat	Cereals	Annual	Arth	Enemy	-0.0425232	NA	NA
bio.47	Brittain et al 2010	Italy	Europe	Europe	On Farm	Grapes	Fruits	Perennial	Arth	Pollinator	0.451275	0.393043	-0.0582319
bio.49	Burger et al 2005	USA	North America	USA	Experiment Station	Tomato	Vegetables	Annual	Microbe	NA	0.82152	NA	NA
bio.51	Caballero-Lopez et al 2010	Spain	Europe	Europe	On Farm	Wheat	Cereals	Annual	Arth	Enemy	-0.620445	NA	NA
bio.51	Caballero-Lopez et al 2010	Spain	Europe	Europe	On Farm	Wheat	Cereals	Annual	Arth	Herbivore	-0.559609	NA	NA
bio.51	Caballero-Lopez et al 2010	Spain	Europe	Europe	On Farm	Wheat	Cereals	Annual	Arth	Enemy	-0.412809	NA	NA
bio.51	Caballero-Lopez et al 2010	Spain	Europe	Europe	On Farm	Wheat	Cereals	Annual	Plant	Producer	-0.412809	NA	NA
bio.52	Caballero-Lopez et al 2012	Spain	Europe	Europe	On Farm	Wheat	Cereals	Annual	Arth	Enemy	-1.22645	NA	NA
bio.52	Caballero-Lopez et al 2012	Spain	Europe	Europe	On Farm	Wheat	Cereals	Annual	Arth	Enemy	0	NA	NA
bio.55	Cardenas et al. 2006	Spain	Europe	Europe	On Farm	Olive	Oil crops	Perennial	Arth	Enemy	0.764988	NA	NA
bio.58	Carvalheiro et al. 2012	South Africa	Africa	NA	On Farm	Mango	Fruits	Perennial	Arth	Herbivore	-1.52634	-1.21964	0.306696
bio.58	Carvalheiro et al. 2012	South Africa	Africa	NA	On Farm	Mango	Fruits	Perennial	Arth	Enemy	-1.15268	-0.860571	0.292109
bio.58	Carvalheiro et al. 2012	South Africa	Africa	NA	On Farm	Mango	Fruits	Perennial	Arth	Enemy	-0.462868	-1.31366	-0.850793
bio.58	Carvalheiro et al. 2012	South Africa	Africa	NA	On Farm	Mango	Fruits	Perennial	Arth	Pollinator	0.526093	1.01055	0.48446
bio.58	Carvalheiro et al. 2012	South Africa	Africa	NA	On Farm	Mango	Fruits	Perennial	Arth	Pollinator	1.25086	0.730419	-0.520443
bio.62	Chamberlain et al. 1999	UK	Europe	Europe	On Farm	Multi	NA	NA	Vert	NA	0.498083	NA	NA
bio.67	Chou et al 2017	Taiwan	Asia	NA	Experiment Station	Banana	Fruits	Perennial	Microbe	NA	0.494742	0.490509	-0.004233
bio.68	Christensen et al. 1996	Denmark	Europe	Europe	On Farm	Multi	NA	NA	Vert	NA	0.406992	NA	NA
bio.71	Clough et al 2006	Germany	Europe	Europe	On Farm	Wheat	Cereals	Annual	Arth	Enemy	-0.125163	NA	NA
bio.71	Clough et al 2006	Germany	Europe	Europe	On Farm	Wheat	Cereals	Annual	Arth	NA	-0.10536	NA	NA
bio.71	Clough et al 2006	Germany	Europe	Europe	On Farm	Wheat	Cereals	Annual	Arth	Decomp	1.09862	NA	NA
bio.77	Cotes et al. 2010a	Spain	Europe	Europe	On Farm	Olive	Oil crops	Perennial	Arth	Enemy	1.05436	NA	NA
bio.78	Crittenden et al 2016	The Netherlands	Europe	Europe	Experiment Station	Wheat	Cereals	Annual	NA	Decomp	1.36889	1.60603	0.237146
bio.78	Crittenden et al 2016	The Netherlands	Europe	Europe	Experiment Station	Wheat	Cereals	Annual	NA	Decomp	1.58195	0.867828	-0.714125
bio.88	Diekotter et al. 2010	Germany	Europe	Europe	On Farm	Wheat	Cereals	Annual	Arth	Enemy	-0.148049	-0.173234	-0.0251849
bio.88	Diekotter et al. 2010	Germany	Europe	Europe	On Farm	Wheat	Cereals	Annual	Arth	Herbivore	0.134657	0.279334	0.144677
bio.88	Diekotter et al. 2010	Germany	Europe	Europe	On Farm	Wheat	Cereals	Annual	Arth	Decomp	0.202759	-0.10447	-0.307229
bio.89	Doles et al. 2001	USA	North America	USA	On Farm	Apple	Fruits	Perennial	Arth	Decomp	-0.0725707	NA	NA
bio.95	Dritscholi & Erwin 1982	USA	North America	USA	On Farm	Corn	Cereals	Annual	Arth	Enemy	0.783808	-0.230268	-1.01408

## Sheet: Richness
pub.id	study.name	country	continent	EU_US	study.type	crop	crop.type	annual.perennial	org.grp	funct.grp	RichRR	RichsdRR	cvRR
bio.100	Ekroos et al. 2010	Finland	Europe	Europe	On Farm	Cereals	Cereals	Annual	Arth	Enemy	0.0858314	0.182296	0.0964648
bio.101	Ekroos et al. 2008	Finland	Europe	Europe	On Farm	Cereals	Cereals	Annual	Arth	Pollinator	-0.0101524	-0.262364	-0.252212
bio.101	Ekroos et al. 2008	Finland	Europe	Europe	On Farm	Cereals	Cereals	Annual	Arth	Pollinator	0.205444	-0.223144	-0.428588
bio.102	Eyre et al 2012	UK	Europe	Europe	Experiment Station	Multi	Vegetables	Annual	Arth	NA	0.0635911	-2.52573	-2.58932
bio.102	Eyre et al 2012	UK	Europe	Europe	Experiment Station	N/A	Vegetables	Annual	Arth	NA	0.077709	-0.223144	-0.300853
bio.102	Eyre et al 2012	UK	Europe	Europe	Experiment Station	Clover	Forage	Annual/perennial	Arth	NA	0.213574	0.133531	-0.0800427
bio.102	Eyre et al 2012	UK	Europe	Europe	Experiment Station	Bean	Pulses	Annual	Arth	Herbivore	0.559616	0.858227	0.298611
bio.102	Eyre et al 2012	UK	Europe	Europe	Experiment Station	Barley	Cereals	Annual	Arth	Herbivore	0.875469	1.18958	0.314115
bio.102	Eyre et al 2012	UK	Europe	Europe	Experiment Station	Wheat	Cereals	Annual	Arth	Herbivore	1.45225	1.58924	0.136983
bio.105	Feber et al. 1998	UK	Europe	Europe	On Farm	Wheat	Cereals	Annual	Arth	Enemy	-0.0645385	1.79176	1.8563
bio.106	Feber et al. 2007	UK	Europe	Europe	On Farm	Multi	NA	NA	Plants	Producer	-0.182322	NA	NA
bio.106	Feber et al. 2007	UK	Europe	Europe	On Farm	Multi	NA	NA	Plants	Producer	-0.074108	NA	NA
bio.110	Fischer et al. 2011a	Germany	Europe	Europe	On Farm	Wheat	Cereals	Annual	Vert	NA	0.135529	0.369175	0.233646
bio.110	Fischer et al. 2011a	Germany	Europe	Europe	On Farm	Wheat	Cereals	Annual	Vert	NA	0.35458	0.198904	-0.155676
bio.110	Fischer et al. 2011a	Germany	Europe	Europe	On Farm	Wheat	Cereals	Annual	Vert	NA	0.619332	0.807978	0.188646
bio.111	Fischer et al. 2011b	Germany	Europe	Europe	On Farm	Wheat	Cereals	Annual	Vert	NA	-0.0222506	0.303682	0.325933
bio.112	Flohre et al. 2011	Germany	Europe	Europe	On Farm	Wheat	Cereals	Annual	NA	Decomp	-0.255712	-0.0274706	0.228241
bio.112	Flohre et al. 2011	Germany	Europe	Europe	On Farm	Wheat	Cereals	Annual	Plants	Producer	3.15618	1.18955	-1.96663
bio.113	Fluetsch & Sparling 1994	USA	North America	USA	On Farm	Apple	Fruits	Perennial	Vert	NA	0.750306	2.29835	1.54805
bio.114	Foissner 1997	Austria	Europe	Europe	NA	Grass	Forage	Annual/perennial	Microbe	Decomp	-0.0618754	2.44512	2.50699
bio.114	Foissner 1997	Austria	Europe	Europe	NA	Grass	Forage	Annual/perennial	Microbe	Decomp	0.0344862	-1.10809	-1.14258
bio.116	Freemark & Kirck	Canada	North America	NA	On Farm	Multi	NA	NA	Vert	NA	-0.0170944	NA	NA
bio.118	Fukuda et al. 2011	New Zealand	Zealandia	NA	On Farm	Dairy	Other	NA	Arth	Decomp	-0.276253	-0.164546	0.111707
bio.118	Fukuda et al. 2011	New Zealand	Zealandia	NA	On Farm	Dairy	Other	NA	Arth	Herbivore	-0.0845574	-0.0916135	-0.00705608
bio.118	Fukuda et al. 2011	New Zealand	Zealandia	NA	On Farm	Dairy	Other	NA	Arth	Herbivore	0.0512933	-0.417811	-0.469105
bio.118	Fukuda et al. 2011	New Zealand	Zealandia	NA	On Farm	Dairy	Other	NA	Arth	Enemy	0.0944097	-0.444494	-0.538903
bio.118	Fukuda et al. 2011	New Zealand	Zealandia	NA	On Farm	Dairy	Other	NA	Arth	Enemy	0.102654	-0.223244	-0.325898
bio.118	Fukuda et al. 2011	New Zealand	Zealandia	NA	On Farm	Dairy	Other	NA	Arth	Decomp	0.182322	0.07421	-0.108112
bio.119	Gabriel & Tscharntke 2007	Germany	Europe	Europe	On Farm	Wheat	Cereals	Annual	Plants	Producer	0.804975	0.442671	-0.362304
bio.119	Gabriel & Tscharntke 2007	Germany	Europe	Europe	On Farm	Wheat	Cereals	Annual	Plants	Producer	1.04849	0.220029	-0.828459
bio.120	Gabriel et al. 2010	UK	Europe	Europe	On Farm	Cereals	Cereals	Annual	Vert	NA	-0.362905	-0.0833816	0.279524
bio.120	Gabriel et al. 2010	UK	Europe	Europe	On Farm	Cereals	Cereals	Annual	Vert	NA	-0.3583	0.0444518	0.402751
bio.120	Gabriel et al. 2010	UK	Europe	Europe	On Farm	Grass	Forage	Annual/perennial	Plants	Producer	0.0118345	0	-0.0118345
bio.120	Gabriel et al. 2010	UK	Europe	Europe	On Farm	Cereals	Cereals	Annual	Plants	Producer	0.0848994	0	-0.0848994
bio.120	Gabriel et al. 2010	UK	Europe	Europe	On Farm	Grass	Forage	Annual/perennial	Plants	Producer	0.12306	0	-0.12306
bio.120	Gabriel et al. 2010	UK	Europe	Europe	On Farm	Cereals	Cereals	Annual	Plants	Producer	0.17185	0.287682	0.115832
bio.120	Gabriel et al. 2010	UK	Europe	Europe	On Farm	Grass	Forage	Annual/perennial	Plants	Producer	0.231112	0	-0.231112
bio.120	Gabriel et al. 2010	UK	Europe	Europe	On Farm	Grass	Forage	Annual/perennial	Plants	Producer	0.567984	0.405465	-0.162519
bio.120	Gabriel et al. 2010	UK	Europe	Europe	On Farm	Cereals	Cereals	Annual	Plants	Producer	1.41838	0.287682	-1.1307
bio.120	Gabriel et al. 2010	UK	Europe	Europe	On Farm	Cereals	Cereals	Annual	Plants	Producer	1.54369	0.693147	-0.850539
bio.121	Gabriel et al. 2006	Germany	Europe	Europe	On Farm	Wheat	Cereals	Annual	Plants	Producer	0.37298	NA	NA
bio.125	Gaiger and Samways 2014	South Africa	Africa	NA	On Farm	Grapes	Fruits	Perennial	Arth	Enemy	0.278154	0.527355	0.249201
bio.126	Galvan et al. 2009	The Netherlands	Europe	Europe	On Farm	Onion	Vegetables	Annual	Microbe	Decomp	0.0800427	-0.584806	-0.664849
bio.126	Galvan et al. 2009	The Netherlands	Europe	Europe	On Farm	Onion	Vegetables	Annual	Microbe	Decomp	0.232622	0.622239	0.389617
bio.13	Armstrong 1995	UK	Europe	Europe	On Farm	Potato	Root	Annual	Arth	Enemy	-0.348307	0.287682	0.635989
bio.132	Genghini et al. 2006	Italy	Europe	Europe	On Farm	Multi	Fruits	Perennial	Vert	NA	0.530628	-0.0425596	-0.573188
bio.134	Ghimire et al 2014	USA	North America	USA	Experiment Station	Grass	Forage	Annual/perennial	Microbe	NA	0.00566574	0.0188093	0.0131436
bio.134	Ghimire et al 2014	USA	North America	USA	Experiment Station	N/A	NA	Annual	Microbe	NA	0.0774875	0.520345	0.442858
bio.134	Ghimire et al 2014	USA	North America	USA	Experiment Station	Grass	Forage	Annual/perennial	Microbe	NA	0.316864	0.081493	-0.235371
bio.134	Ghimire et al 2014	USA	North America	USA	Experiment Station	N/A	NA	Annual	Microbe	NA	0.414199	0.0188093	-0.395389
bio.134	Ghimire et al 2014	USA	North America	USA	Experiment Station	N/A	NA	Annual	Microbe	NA	0.554628	0.479573	-0.0750552
bio.134	Ghimire et al 2014	USA	North America	USA	Experiment Station	Grass	Forage	Annual/perennial	Microbe	NA	0.689669	-0.251314	-0.940983
bio.139	Glenn et al 2015	USA	North America	USA	Experiment Station	Apple	Fruits	Perennial	Microbe	NA	-1.94591	NA	NA
bio.139	Glenn et al 2015	USA	North America	USA	Experiment Station	Apple	Fruits	Perennial	Microbe	NA	-0.252855	NA	NA
bio.139	Glenn et al 2015	USA	North America	USA	Experiment Station	Apple	Fruits	Perennial	Microbe	NA	0.72647	NA	NA
bio.14	Aude et al. 2003	Denmark	Europe	Europe	On Farm	Multi	NA	NA	Plants	Producer	0.295464	0.372171	0.0767072
bio.146	Halde et al 2015	Canada	North America	NA	Experiment Station	Cereals	Cereals	Annual	Plants	Producer	0.22544	NA	NA
bio.147	Hager and Avalos 2017	Costa Rica	South America	NA	On Farm	Coffee	Beverage	Perennial	Plants	Producer	0.317946	0.329753	0.0118076
bio.149	Haggar et al 2015	Costa Rica and Guatemala	North America	NA	On Farm	Coffee	Beverage	Perennial	Plants	Producer	0.517056	NA	NA
bio.15	Aurelian et al 2015	Canada	North America	NA	On Farm	Apple	Fruits	Perennial	Microbe	NA	0.156004	NA	NA
bio.153	Hartmann et al 2015	Switzerland	Europe	Europe	Experiment Station	Wheat	Cereals	Annual	Microbe	NA	0.0509064	0.470004	0.419097
bio.153	Hartmann et al 2015	Switzerland	Europe	Europe	Experiment Station	Wheat	Cereals	Annual	Microbe	NA	0.0901511	0.133531	0.0433803
bio.154	Hawes et al. 2010	UK	Europe	Europe	On Farm	Multi	NA	Annual	Plants	Producer	0.280031	-0.205765	-0.485796
bio.154	Hawes et al. 2010	UK	Europe	Europe	On Farm	Multi	NA	Annual	Plants	Producer	0.513176	0.106684	-0.406492
bio.156	Helenius 1990	Finland	Europe	Europe	Experiment Station	Barley	Cereals	Annual	Arth	Enemy	0	NA	NA
bio.159	Hesler et al. 1993	USA	North America	USA	On Farm	Rice	Cereals	Annual	Arth	Enemy	-0.0281709	-1.09861	-1.07044
bio.160	Hokkanen & Holopainen 1986	Germany	Europe	Europe	On Farm	Cabbage	Vegetables	Annual	Arth	Herbivore	0.538997	1.79176	1.25276
bio.160	Hokkanen & Holopainen 1986	Germany	Europe	Europe	On Farm	Cabbage	Vegetables	Annual	Arth	Enemy	0.569095	0.405465	-0.163629
bio.161	Holzschuh et al. 2008	Germany	Europe	Europe	On Farm	Wheat	Cereals	Annual	Plants	Producer	0.309617	-0.193423	-0.50304
bio.161	Holzschuh et al. 2008	Germany	Europe	Europe	On Farm	Wheat	Cereals	Annual	Arth	Pollinator	0.471585	NA	NA
bio.161	Holzschuh et al. 2008	Germany	Europe	Europe	On Farm	Wheat	Cereals	Annual	Plants	Producer	0.847298	0	-0.847298
bio.162	Holzschuh et al. 2010	Germany	Europe	Europe	On Farm	Wheat	Cereals	Annual	Arth	Pollinator	0.206285	0.091257	-0.115028
bio.162	Holzschuh et al. 2010	Germany	Europe	Europe	On Farm	Wheat	Cereals	Annual	Arth	Enemy	0.677557	0	-0.677557
bio.162	Holzschuh et al. 2010	Germany	Europe	Europe	On Farm	Wheat	Cereals	Annual	Plants	Producer	1.56124	0.405465	-1.15577
bio.163	Holzschuh et al. 2007	Germany	Europe	Europe	On Farm	Wheat	Cereals	Annual	Arth	Pollinator	1.23327	0.536674	-0.696595
bio.164	Hutton & Giller 2003	Ireland	Europe	Europe	On Farm	Grass	Forage	Annual/perennial	Arth	Decomp	0.314493	0.381935	0.0674413
bio.165	Hyvonen et al. 2003	Finland	Europe	Europe	On Farm	Cereals	Cereals	Annual	Plants	Producer	0.136602	0.197826	0.061224
bio.169	Irmler 2003	Germany	Europe	Europe	On Farm	Multi	NA	Annual	Arth	Enemy	0.275525	0.402122	0.126597
bio.170	Isaia et al 2006	Italy	Europe	Europe	On Farm	Grapes	Fruits	Perennial	Microbe	Enemy	-0.0266682	NA	NA
bio.173	Jaffee et al 1998	USA	North America	USA	Experiment Station	Multi	Other	Annual	NA	NA	0.170062	0.0606246	-0.109438
bio.177	Jerez-Valle et al 2014	Spain	Europe	Europe	On Farm	Olive	Oil crops	Perennial	Arth	NA	0.272847	0.0253178	-0.247529
bio.178	Jonason et al. 2011	Sweden	Europe	Europe	On Farm	Cereals	Cereals	Annual	Plants	Producer	0.158494	-0.452321	-0.610815
bio.178	Jonason et al. 2011	Sweden	Europe	Europe	On Farm	Cereals	Cereals	Annual	Arth	Pollinator	0.203912	0.289835	0.0859227
bio.179	Jonason et al. 2013	Sweden	Europe	Europe	On Farm	Cereals	Cereals	Annual	Arth	Enemy	0.0444518	0.00808643	-0.0363653
bio.184	Jose-Maria & Sans 2011	Spain	Europe	Europe	On Farm	Cereals	Cereals	Annual	Plants	Producer	0.252723	0	-0.252723
bio.184	Jose-Maria & Sans 2011	Spain	Europe	Europe	On Farm	Cereals	Cereals	Annual	Plants	Producer	0.463103	0	-0.463103
bio.188	Karlsson et al 2017	Sweden	Europe	Europe	On Farm	Wheat	Cereals	Annual	Microbe	NA	0.300105	-1.01572	-1.31583
bio.193	Kirk and Lindsay 2017	Canada	North America	NA	On Farm	Cereals	Cereals	Annual	Vert	NA	0.074108	NA	NA
bio.198	Krauss et al 2011	Germany	Europe	Europe	On Farm	Cereals	Cereals	Annual	Plants	NA	-0.728865	NA	NA
bio.198	Krauss et al 2011	Germany	Europe	Europe	On Farm	Cereals	Cereals	Annual	Plants	NA	-0.728865	NA	NA
bio.198	Krauss et al 2011	Germany	Europe	Europe	On Farm	Cereals	Cereals	Annual	Plants	NA	-0.728865	NA	NA
bio.199	Kremen et al. 2004	USA	North America	USA	On Farm	Watermelon	Vegetables	Annual	Arth	Pollinator	0.345951	0.670742	0.324791
bio.199	Kremen et al. 2004	USA	North America	USA	On Farm	Watermelon	Vegetables	Annual	Arth	Pollinator	0.528217	0.887365	0.359148
bio.2	Aavik & Liira 2010	Estonia	Europe	Europe	On Farm	Cereals	Cereals	Annual	Plants	Producer	0.0156009	0.0757508	0.0601499
bio.2	Aavik & Liira 2010	Estonia	Europe	Europe	On Farm	Cereals	Cereals	Annual	Plants	Producer	0.221111	0.275713	0.0546024
bio.201	Kromp 1989	Austria	Europe	Europe	Experiment Station	Wheat	Cereals	Annual	Arth	Enemy	0.175335	0.0367014	-0.138634
bio.202	Kromp 1990	Austria	Europe	Europe	Experiment Station	Potato	Root	Annual	Arth	Enemy	0.146603	0.134036	-0.0125672
bio.21	Batary et al. 2012	Germany	Europe	Europe	On Farm	Wheat	Cereals	Annual	Arth	Enemy	0.0907544	-0.0624932	-0.153248
bio.210	Letourneau and Goldstein 2001	USA	North America	USA	On Farm	Tomato	Vegetables	Annual	Arth	Herbivore	0.36179	0.262364	-0.0994258
bio.210	Letourneau and Goldstein 2001	USA	North America	USA	On Farm	Tomato	Vegetables	Annual	Arth	Enemy	0.381935	0.194156	-0.187779
bio.210	Letourneau and Goldstein 2001	USA	North America	USA	On Farm	Tomato	Vegetables	Annual	Arth	NA	0.791587	1.50408	0.71249
bio.217	Lokemoen & Beiser 1997	USA	North America	USA	On Farm	Multi	NA	NA	Vert	NA	0.575364	0	-0.575364
bio.222	Lupatini et al 2017	The Netherlands	Europe	Europe	Experiment Station	Cereals	Cereals	Annual	Microbe	NA	0.0573426	NA	NA
bio.225	Macfadyen et al 2009a	UK	Europe	Europe	On Farm	Multi	NA	NA	Arth	Enemy	0.325422	NA	NA
bio.225	Macfadyen et al 2009a	UK	Europe	Europe	On Farm	Multi	NA	NA	Arth	Herbivore	0.553885	NA	NA
bio.225	Macfadyen et al 2009a	UK	Europe	Europe	On Farm	Multi	NA	NA	Plants	Producer	0.652325	NA	NA
bio.229	Mallinger et al 2015	USA	North America	USA	On Farm	Apple	Fruits	Perennial	Arth	Pollinator	-0.238411	-0.276253	-0.0378424
bio.229	Mallinger et al 2015	USA	North America	USA	On Farm	Apple	Fruits	Perennial	Arth	Pollinator	0.287682	0.275653	-0.0120286
bio.230	Manhoudt et al. 2007	The Netherlands	Europe	Europe	On Farm	N/A	NA	NA	Plants	Producer	0.170131	0.624868	0.454738
bio.230	Manhoudt et al. 2007	The Netherlands	Europe	Europe	On Farm	N/A	NA	NA	Plants	Producer	0.334594	0.545764	0.211169
bio.234	Marja et al 2014	Estonia	Europe	Europe	On Farm	N/A	NA	NA	Arth	Pollinator	-0.366599	-0.290364	0.0762349
bio.234	Marja et al 2014	Estonia	Europe	Europe	On Farm	N/A	NA	NA	Vert	NA	4.27667	5.36598	1.08931
bio.235	Martin et al. 2016	South Korea	Asia	NA	On Farm	Potato	Root	Annual	Arth	Enemy	-0.374693	-3.32016	-2.94546
bio.235	Martin et al. 2016	South Korea	Asia	NA	On Farm	Rice	Cereals	Annual	Arth	Enemy	0.0946652	-0.764812	-0.859477
bio.235	Martin et al. 2016	South Korea	Asia	NA	On Farm	Soybean	Oil crops	Annual	Arth	Enemy	0.117783	0.704649	0.586866
bio.235	Martin et al. 2016	South Korea	Asia	NA	On Farm	Radish	Vegetables	Annual	Arth	Enemy	0.356675	NA	NA
bio.24	Bates & Harris 2009	UK	Europe	Europe	On Farm	Multi	NA	NA	Vert	NA	-0.154151	NA	NA
bio.241	Menalled et al 2001	USA	North America	USA	Experiment Station	Cereals	Cereals	Annual	Plants	Producer	0.972319	0.56453	-0.407789
bio.251	Moreby et al. 1994	UK	Europe	Europe	On Farm	Wheat	Cereals	Annual	Arth	NA	0	NA	NA
bio.251	Moreby et al. 1994	UK	Europe	Europe	On Farm	Wheat	Cereals	Annual	Arth	Enemy	0	NA	NA
bio.251	Moreby et al. 1994	UK	Europe	Europe	On Farm	Wheat	Cereals	Annual	Plants	Producer	1.19339	0	-1.19339
bio.258	Neher 1999	USA	North America	USA	On Farm	Multi	NA	NA	NA	Herbivore	0	NA	NA
bio.258	Neher 1999	USA	North America	USA	On Farm	Multi	NA	NA	NA	NA	0	NA	NA
bio.258	Neher 1999	USA	North America	USA	On Farm	Multi	NA	NA	NA	NA	0	NA	NA
bio.258	Neher 1999	USA	North America	USA	On Farm	Multi	NA	NA	NA	NA	0.154151	NA	NA
bio.258	Neher 1999	USA	North America	USA	On Farm	Multi	NA	NA	NA	Enemy	0.287682	NA	NA
bio.26	Beecher et al. 2002	USA	North America	USA	On Farm	Corn	Cereals	Annual	Vert	NA	0.071459	NA	NA
bio.260	Oberg 2007	Sweden	Europe	Europe	On Farm	Cereals	Cereals	Annual	Arth	Enemy	-0.240798	2.54101	2.78181
bio.262	Oehl et al 2004	Switzerland	Europe	Europe	On Farm	N/A	Other	Annual	Microbe	NA	0.238411	NA	NA
bio.265	Ondine et al. 2009	France	Europe	Europe	On Farm	Cereals	Cereals	Annual	Vert	NA	0	NA	NA
bio.270	Pelosi et al. 2009	France	Europe	Europe	Experiment Station	Wheat	Cereals	Annual	NA	Decomp	0	0.0163804	0.0163804
bio.273	Pershina et al 2015	Finland	Europe	Europe	Experiment Station	Grass	Forage	Annual/perennial	Microbe	NA	0.103743	0	-0.103743
bio.274	Peterson et al. 2006	Denmark	Europe	Europe	On Farm	Dairy	Other	NA	Plants	Producer	0.367149	0.69427	0.327121
bio.278	Pfiffner & Mader 1997	Switzerland	Europe	Europe	Experiment Station	Wheat	Cereals	Annual	NA	Decomp	0	NA	NA
bio.278	Pfiffner & Mader 1997	Switzerland	Europe	Europe	Experiment Station	Beetroot	Root	Annual	NA	Decomp	0.0645385	NA	NA
bio.278	Pfiffner & Mader 1997	Switzerland	Europe	Europe	Experiment Station	Potato	Root	Annual	NA	Decomp	0.211309	NA	NA
bio.279	Pfiffner & Niggli 1996	Switzerland	Europe	Europe	Experiment Station	Wheat	Cereals	Annual	Arth	Enemy	0.309928	0.287027	-0.0229003
bio.283	Pokharel et al. 2015	USA	North America	USA	Experiment Station	Apple	Fruits	Perennial	NA	NA	0.179782	NA	NA
bio.283	Pokharel et al. 2015	USA	North America	USA	Experiment Station	Peach	Fruits	Perennial	NA	NA	0.4379	NA	NA
bio.284	Pollnac et al. 2009	USA	North America	USA	Experiment Station	Wheat	Cereals	Annual	Plants	Producer	1.33702	1.00458	-0.33244
bio.285	Ponce et al. 2011	Spain	Europe	Europe	On Farm	Barley	Cereals	Annual	Arth	Decomp	-0.197826	0.260648	0.458474
bio.285	Ponce et al. 2011	Spain	Europe	Europe	On Farm	Barley	Cereals	Annual	Arth	Enemy	-0.09105	-0.492921	-0.401871
bio.285	Ponce et al. 2011	Spain	Europe	Europe	On Farm	Wheat	Cereals	Annual	Arth	Enemy	0.0236099	0.0750099	0.0514
bio.285	Ponce et al. 2011	Spain	Europe	Europe	On Farm	Wheat	Cereals	Annual	Arth	Decomp	0.0475788	0.65335	0.605771
bio.285	Ponce et al. 2011	Spain	Europe	Europe	On Farm	Wheat	Cereals	Annual	Arth	Herbivore	0.205548	-0.0848037	-0.290352
bio.285	Ponce et al. 2011	Spain	Europe	Europe	On Farm	Barley	Cereals	Annual	Arth	Herbivore	0.333144	0.813728	0.480584
bio.288	Power & Stout 2011	Ireland	Europe	Europe	On Farm	Dairy	Other	NA	Arth	Pollinator	0.0526437	-0.134919	-0.187563
bio.288	Power & Stout 2011	Ireland	Europe	Europe	On Farm	Dairy	Other	NA	Plants	Producer	0.336472	0.594412	0.25794
bio.290	Power et al. 2012	Ireland	Europe	Europe	On Farm	Dairy	Other	NA	Plants	Producer	0.25699	-0.02174	-0.27873
bio.292	Puig-Montserrat et al. 2017	Spain	Europe	Europe	On Farm	Grapes	Fruits	Perennial	Arth	NA	0.0510338	-0.0152675	-0.0663013
bio.292	Puig-Montserrat et al. 2017	Spain	Europe	Europe	On Farm	Grapes	Fruits	Perennial	Vert	NA	0.12036	0.255205	0.134845
bio.292	Puig-Montserrat et al. 2017	Spain	Europe	Europe	On Farm	Grapes	Fruits	Perennial	Plants	Producer	0.268241	-0.116637	-0.384878
bio.293	Purtauf et al. 2005	Germany	Europe	Europe	On Farm	Wheat	Cereals	Annual	Arth	Enemy	-0.074221	-0.101523	-0.0273015
bio.295	Radic et al. 2014	Croatia	Europe	Europe	On Farm	Grapes	Fruits	Perennial	Microbe	NA	0.640037	0.86767	0.227633
bio.296	Ramirez et al. 2009	USA	North America	USA	On Farm	Potato	Root	Annual	NA	Herbivore	0	NA	NA
bio.298	Reddersen 1997	Denmark	Europe	Europe	On Farm	Cereals	Cereals	Annual	Arth	NA	0.223144	0	-0.223144
bio.302	Rizo-Patron et al. 2013	Costa Rica	North America	NA	On Farm	Rice	Cereals	Annual	NA	NA	0.105361	NA	NA
bio.302	Rizo-Patron et al. 2013	Costa Rica	North America	NA	On Farm	Rice	Cereals	Annual	Arth	NA	0.393043	NA	NA
bio.304	Romero et al. 2008	Spain	Europe	Europe	On Farm	Cereals	Cereals	Annual	Plants	Producer	0.567984	NA	NA
bio.305	Roschewitz et al. 2005	Germany	Europe	Europe	On Farm	Wheat	Cereals	Annual	Plants	Producer	-0.117783	NA	NA
bio.305	Roschewitz et al. 2005	Germany	Europe	Europe	On Farm	Wheat	Cereals	Annual	Plants	Producer	0.381935	NA	NA
bio.306	Rotches-Ribalta et al. 2016	Switzerland	Europe	Europe	Experiment Station	Multi	Multi	Annual/perennial	Plants	NA	0.472604	0	-0.472604
bio.308	Rundlof et al. 2010	Sweden	Europe	Europe	On Farm	Cereals	Cereals	Annual	Plants	Producer	0.345565	-0.408239	-0.753804
bio.308	Rundlof et al. 2010	Sweden	Europe	Europe	On Farm	Cereals	Cereals	Annual	Plants	Producer	0.404084	0.335523	-0.0685612
bio.308	Rundlof et al. 2010	Sweden	Europe	Europe	On Farm	Cereals	Cereals	Annual	Plants	Producer	0.574806	-0.0935934	-0.668399
bio.309	Rundlof et al. 2008b	Sweden	Europe	Europe	On Farm	Cereals	Cereals	Annual	Arth	Pollinator	0.293761	0.231802	-0.0619595
bio.309	Rundlof et al. 2008b	Sweden	Europe	Europe	On Farm	Cereals	Cereals	Annual	Plants	Producer	0.638234	0.451985	-0.186249
bio.309	Rundlof et al. 2008b	Sweden	Europe	Europe	On Farm	Cereals	Cereals	Annual	Arth	Pollinator	1.26094	0.470004	-0.790936
bio.31	Bernard et al 2012	USA	North America	USA	NA	Potato	Root	Annual	Microbe	NA	0.00248447	NA	NA
bio.311	Rundlof et al. 2006	Sweden	Europe	Europe	On Farm	Cereals	Cereals	Annual	Arth	Pollinator	0.141798	0.287682	0.145884
bio.311	Rundlof et al. 2006	Sweden	Europe	Europe	On Farm	Cereals	Cereals	Annual	Arth	Pollinator	1.08059	0.980829	-0.0997645
bio.313	Sahraoui et al. 2015	Tunisia	Africa	NA	On Farm	Cirtus	Fruits	Perennial	Arth	Enemy	0.470004	NA	NA
bio.314	Salonen et al. 2001	Finland	Europe	Europe	On Farm	Cereals	Cereals	Annual	Plants	Producer	0.0632025	0.0221159	-0.0410866
bio.316	Sanchez-Moreno et al. 2009	USA	North America	USA	Experiment Station	Multi	NA	Annual	Arth	NA	-0.0194721	-0.546544	-0.527072
bio.316	Sanchez-Moreno et al. 2009	USA	North America	USA	Experiment Station	Multi	NA	Annual	NA	NA	0.155797	0.0833816	-0.0724156
bio.316	Sanchez-Moreno et al. 2009	USA	North America	USA	Experiment Station	Multi	NA	Annual	Arth	Enemy	0.376519	-0.316337	-0.692856
bio.317	Schmidt et al. 2005	Germany	Europe	Europe	On Farm	Wheat	Cereals	Annual	Arth	Enemy	-0.240638	-0.107601	0.133037
bio.32	Berry et al. 1996	New Zealand	Zealandia	NA	On Farm	Carrot	Vegetables	Annual	Arth	Enemy	0	NA	NA
bio.324	Smith et al. 2010	Sweden	Europe	Europe	On Farm	Multi	NA	Annual	Vert	NA	-0.0264459	0.00614859	0.0325945
bio.324	Smith et al. 2010	Sweden	Europe	Europe	On Farm	Multi	NA	Annual	Vert	NA	0.315369	0.000184799	-0.315184
bio.325	Smith & Gross 2010	USA	North America	USA	Experiment Station	Cereals	Multi	Annual	Plants	Producer	-0.226313	-0.980829	-0.754516
bio.325	Smith & Gross 2010	USA	North America	USA	Experiment Station	Corn	Cereals	Annual	Plants	Producer	0.231112	-0.287682	-0.518794
bio.328	Somavilla et al. 2016	Brazil	South America	NA	Experiment Station	Guarana	Beverage	Perennial	Arth	Enemy	0.0870114	NA	NA
bio.329	Srithi et al. 2017	Thailand	Asia	NA	On Farm	Tea	Beverage	Perennial	Plants	Producer	0.358398	NA	NA
bio.331	Stagnari et al. 2015	Italy	Europe	Europe	Experiment Station	Multi	Multi	Annual	Microbe	NA	-1.97716	NA	NA
bio.335	Syswerda & Robertson 2014	USA	North America	USA	Experiment Station	Alfalfa	Forage	Annual/perennial	Plants	Producer	0.770013	-0.302594	-1.07261
bio.339	Thomas et al. 2011	Canada	North America	NA	On Farm	N/A	NA	NA	Arth	NA	0.0288865	0.0833816	0.0544951
bio.339	Thomas et al. 2011	Canada	North America	NA	On Farm	N/A	NA	NA	Vert	NA	0.281339	0.24909	-0.0322493
bio.342	Tyser et al. 2015	Czech Republic	Europe	Europe	On Farm	Cereals	Cereals	Annual	Plants	Producer	0.444408	NA	NA
bio.343	Ulber et al. 2009	Germany	Europe	Europe	On Farm	Wheat	Cereals	Annual	Plants	Producer	0.285199	0.575223	0.290023
bio.345	van der Gast et al. 2010	UK	Europe	Europe	On Farm	N/A	NA	Annual	Microbe	NA	0.253781	0.410946	0.157166
bio.347	Van Diepeningen et al. 2006a	The Netherlands	Europe	Europe	On Farm	N/A	NA	NA	Microbe	NA	0.12565	0.0162166	-0.109434
bio.347	Van Diepeningen et al. 2006a	The Netherlands	Europe	Europe	On Farm	N/A	NA	NA	NA	NA	0.142298	-0.201516	-0.343814
bio.348	Van Geel et al. 2015	Belgium	Europe	Europe	On Farm	Apple	Fruits	Perennial	Microbe	NA	0.166769	NA	NA
bio.349	Van Geel et al. 2017	Belgium and The Netherlands	Europe	Europe	On Farm	Grapes	Fruits	Perennial	Microbe	NA	-0.111226	NA	NA
bio.35	Bithell et al. 2005	New Zealand	Zealandia	NA	On Farm	Grass	Forage	Annual/perennial	NA	Decomp	0	-0.287648	-0.287648
bio.350	Vega-Avila et al. 2015	Argentina	South America	NA	On Farm	Grapes	Fruits	Perennial	Microbe	NA	0.339574	0.712175	0.372601
bio.352	Verbruggen et al. 2010	The Netherlands	Europe	Europe	On Farm	Corn	Cereals	Annual	Microbe	NA	0.138836	3.50656	3.36773
bio.352	Verbruggen et al. 2010	The Netherlands	Europe	Europe	On Farm	Potato	Root	Annual	Microbe	NA	0.510826	0.606134	0.0953088
bio.355	Vesely & Sarapatka 2008	Czech Republic	Europe	Europe	Experiment Station	Barley	Cereals	Annual	Arth	Enemy	-0.417735	-1.94591	-1.52817
bio.355	Vesely & Sarapatka 2008	Czech Republic	Europe	Europe	Experiment Station	Barley	Cereals	Annual	Arth	Enemy	0.0186921	0.693147	0.674455
bio.355	Vesely & Sarapatka 2008	Czech Republic	Europe	Europe	Experiment Station	Wheat	Cereals	Annual	Arth	Enemy	0.451985	2.3979	1.94591
bio.360	Wang et al. 2017b	USA	North America	USA	On Farm	N/A	NA	NA	Microbe	NA	0.0901511	0	-0.0901511
bio.361	Weibull & Ostman 2003	Sweden	Europe	Europe	On Farm	Multi	NA	NA	Arth	Enemy	-0.299803	-0.408679	-0.108875
bio.361	Weibull & Ostman 2003	Sweden	Europe	Europe	On Farm	Multi	NA	NA	Arth	Enemy	-0.202916	0.779656	0.982572
bio.361	Weibull & Ostman 2003	Sweden	Europe	Europe	On Farm	Multi	NA	NA	Arth	Enemy	-0.13787	-0.0582083	0.0796615
bio.361	Weibull & Ostman 2003	Sweden	Europe	Europe	On Farm	Multi	NA	NA	Arth	Enemy	-0.114776	0.165185	0.279961
bio.361	Weibull & Ostman 2003	Sweden	Europe	Europe	On Farm	Multi	NA	NA	Arth	Enemy	-0.0867479	-0.19671	-0.109962
bio.361	Weibull & Ostman 2003	Sweden	Europe	Europe	On Farm	Multi	NA	NA	Plants	Producer	-0.0567765	-0.00642178	0.0503547
bio.361	Weibull & Ostman 2003	Sweden	Europe	Europe	On Farm	Multi	NA	NA	Arth	Enemy	-0.0432377	-0.0693611	-0.0261234
bio.361	Weibull & Ostman 2003	Sweden	Europe	Europe	On Farm	Multi	NA	NA	Arth	Pollinator	-0.0363676	0.365234	0.401602
bio.361	Weibull & Ostman 2003	Sweden	Europe	Europe	On Farm	Multi	NA	NA	Arth	Enemy	-0.0206193	0.277445	0.298064
bio.361	Weibull & Ostman 2003	Sweden	Europe	Europe	On Farm	Multi	NA	NA	Arth	Enemy	-0.0124225	-0.104814	-0.0923913
bio.361	Weibull & Ostman 2003	Sweden	Europe	Europe	On Farm	Multi	NA	NA	Plants	Producer	0.0933319	0.309963	0.216631
bio.361	Weibull & Ostman 2003	Sweden	Europe	Europe	On Farm	Multi	NA	NA	Arth	Pollinator	0.58103	0.0913002	-0.48973
bio.362	Weibull et al. 2000	Sweden	Europe	Europe	On Farm	Cereals	Cereals	Annual	Arth	Pollinator	-0.028492	0.037938	0.06643
bio.363	Wickramasinghe et al. 2004	UK	Europe	Europe	On Farm	Grass	Forage	Annual/perennial	Arth	NA	0.0727594	NA	NA
bio.364	Wickramasinghe et al. 2003	UK	Europe	Europe	On Farm	Grass	Forage	Annual/perennial	Vert	NA	0.105361	NA	NA
bio.364	Wickramasinghe et al. 2003	UK	Europe	Europe	On Farm	N/A	Vegetables	NA	Vert	NA	0.133531	NA	NA
bio.368	Winfree et al. 2007	USA	North America	USA	On Farm	Watermelon	Vegetables	Annual	Arth	Pollinator	-0.126414	-0.648087	-0.521673
bio.368	Winfree et al. 2007	USA	North America	USA	On Farm	Watermelon	Vegetables	Annual	Arth	Pollinator	-0.105361	-0.369021	-0.263661
bio.368	Winfree et al. 2007	USA	North America	USA	On Farm	Watermelon	Vegetables	Annual	Arth	Pollinator	-0.0966268	0.948818	1.04544
bio.368	Winfree et al. 2007	USA	North America	USA	On Farm	Watermelon	Vegetables	Annual	Arth	Pollinator	0.127155	0.173883	0.0467283
bio.368	Winfree et al. 2007	USA	North America	USA	On Farm	Watermelon	Vegetables	Annual	Arth	Pollinator	0.264152	-1.14289	-1.40704
bio.369	Winfree et al. 2008	USA	North America	USA	On Farm	Tomato	Vegetables	Annual	Arth	Pollinator	0.117783	-0.117097	-0.23488
bio.369	Winfree et al. 2008	USA	North America	USA	On Farm	Pepper	Beverage	Annual	Arth	Pollinator	0.149261	0.266646	0.117385
bio.372	Winqvist et al. 2011	Sweden	Europe	Europe	On Farm	Cereals	Cereals	Annual	Arth	Enemy	-0.00966962	-0.205012	-0.195342
bio.373	Wortman et al. 2010	USA	North America	USA	Experiment Station	Corn	Cereals	Annual	Plants	Producer	0.475597	NA	NA
bio.376	Yeates et al. 1997	UK	Europe	Europe	On Farm	Grass	Forage	Annual/perennial	Microbe	Decomp	0.04652	1.01366	0.967145
bio.378	Danhardt et al. 2010	Sweden	Europe	Europe	On Farm	Cereals	Cereals	Annual	Vert	NA	0.106972	NA	NA
bio.382	Letourneau et al. 2015	USA	North America	USA	On Farm	Multi	Vegetables	Annual	Arth	Enemy	0.122218	0.867127	0.74491
bio.383	Bruggisser et al. 2010	Switzerland	Europe	Europe	On Farm	Grapes	Fruits	Perennial	Arth	Enemy	-0.606136	NA	NA
bio.384	Koss et al. 2005	USA	North America	USA	On Farm	Potato	Root	Annual	Arth	Enemy	0	NA	NA
bio.385	Neher & Olson 1999	USA	North America	USA	Experiment Station	Multi	NA	NA	NA	NA	-0.336472	NA	NA
bio.385	Neher & Olson 1999	USA	North America	USA	Experiment Station	Multi	NA	NA	NA	NA	-0.0953102	NA	NA
bio.385	Neher & Olson 1999	USA	North America	USA	Experiment Station	Multi	NA	NA	NA	Herbivore	-0.074108	NA	NA
bio.385	Neher & Olson 1999	USA	North America	USA	Experiment Station	Multi	NA	NA	NA	Enemy	0.117783	NA	NA
bio.386	O'Sullivan & Gormally 2002	Ireland	Europe	Europe	On Farm	Potato	Root	Annual	Arth	Enemy	0	NA	NA
bio.387	Paoletti et al. 1995	Italy	Europe	Europe	On Farm	Apple	Fruits	Perennial	Arth	Pollinator	-0.122602	NA	NA
bio.387	Paoletti et al. 1995	Italy	Europe	Europe	On Farm	Apple	Fruits	Perennial	Arth	Enemy	0.0625204	NA	NA
bio.387	Paoletti et al. 1995	Italy	Europe	Europe	On Farm	Apple	Fruits	Perennial	NA	Decomp	0.451985	NA	NA
bio.388	Ruano et al. 2004	Spain	Europe	Europe	On Farm	Olive	Oil crops	Perennial	Arth	NA	0	NA	NA
bio.389	Zalazar & Salvo 2007	Argentina	South America	NA	On Farm	Multi	Vegetables	Annual	Arth	NA	1.08463	NA	NA
bio.41	Bouffaud et al 2016	France	Europe	Europe	On Farm	Grapes	Fruits	Perennial	Microbe	NA	0.320908	-0.0291347	-0.350042
bio.42	Boutin et al. 2008	Canada	North America	NA	On Farm	Multi	NA	NA	Plants	Producer	0.303579	0.200609	-0.10297
bio.42	Boutin et al. 2008	Canada	North America	NA	On Farm	Multi	NA	NA	Plants	Producer	0.7233	0	-0.7233
bio.43	Boutin et al. 2011	Canada	North America	NA	On Farm	Multi	NA	NA	Arth	NA	0.064144	0	-0.064144
bio.43	Boutin et al. 2011	Canada	North America	NA	On Farm	Multi	NA	NA	Arth	NA	0.129073	0.476885	0.347813
bio.44	Boutin et al. 2009	Canada	North America	NA	On Farm	Multi	NA	NA	Arth	Enemy	0.00382669	0.353753	0.349927
bio.44	Boutin et al. 2009	Canada	North America	NA	On Farm	Multi	NA	NA	Arth	Herbivore	0.0550982	-0.143521	-0.198619
bio.44	Boutin et al. 2009	Canada	North America	NA	On Farm	Multi	NA	NA	Arth	Herbivore	0.079994	0.049142	-0.030852
bio.44	Boutin et al. 2009	Canada	North America	NA	On Farm	Multi	NA	NA	Arth	Enemy	0.103568	0.320413	0.216844
bio.45	Basedow 1998	Germany	Europe	Europe	On Farm	Wheat	Cereals	Annual	Arth	Enemy	0.287682	NA	NA
bio.47	Brittain et al 2010	Italy	Europe	Europe	On Farm	Grapes	Fruits	Perennial	Arth	Pollinator	0.107246	-0.154151	-0.261396
bio.51	Caballero-Lopez et al 2010	Spain	Europe	Europe	On Farm	Wheat	Cereals	Annual	Arth	Enemy	0	NA	NA
bio.51	Caballero-Lopez et al 2010	Spain	Europe	Europe	On Farm	Wheat	Cereals	Annual	Arth	Herbivore	0.0377403	NA	NA
bio.51	Caballero-Lopez et al 2010	Spain	Europe	Europe	On Farm	Wheat	Cereals	Annual	Arth	Enemy	0.154151	NA	NA
bio.51	Caballero-Lopez et al 2010	Spain	Europe	Europe	On Farm	Wheat	Cereals	Annual	Plants	Producer	0.986495	NA	NA
bio.52	Caballero-Lopez et al 2012	Spain	Europe	Europe	On Farm	Wheat	Cereals	Annual	Plants	Producer	0.847298	NA	NA
bio.55	Cardenas et al. 2006	Spain	Europe	Europe	On Farm	Olive	Oil crops	Perennial	Arth	Enemy	0	NA	NA
bio.58	Carvalheiro et al. 2012	South Africa	Africa	NA	On Farm	Mango	Fruits	Perennial	Arth	Enemy	-1.09861	-0.89588	0.202733
bio.58	Carvalheiro et al. 2012	South Africa	Africa	NA	On Farm	Mango	Fruits	Perennial	Arth	Herbivore	-0.693147	-0.178337	0.51481
bio.58	Carvalheiro et al. 2012	South Africa	Africa	NA	On Farm	Mango	Fruits	Perennial	Arth	Pollinator	0.223144	0.571381	0.348237
bio.58	Carvalheiro et al. 2012	South Africa	Africa	NA	On Farm	Mango	Fruits	Perennial	Arth	Enemy	1.2164	-0.282446	-1.49884
bio.58	Carvalheiro et al. 2012	South Africa	Africa	NA	On Farm	Mango	Fruits	Perennial	Arth	Pollinator	1.25276	0.502761	-0.750002
bio.62	Chamberlain et al. 1999	UK	Europe	Europe	On Farm	Multi	NA	NA	Vert	NA	0	NA	NA
bio.68	Christensen et al. 1996	Denmark	Europe	Europe	On Farm	Multi	NA	NA	Vert	NA	0.471312	-0.544051	-1.01536
bio.71	Clough et al 2006	Germany	Europe	Europe	On Farm	Wheat	Cereals	Annual	Arth	Decomp	-0.223144	NA	NA
bio.71	Clough et al 2006	Germany	Europe	Europe	On Farm	Wheat	Cereals	Annual	Arth	Enemy	0	NA	NA
bio.71	Clough et al 2006	Germany	Europe	Europe	On Farm	Wheat	Cereals	Annual	Arth	NA	0.133531	NA	NA
bio.74	Clough et al 2007B	Germany	Europe	Europe	On Farm	Wheat	Cereals	Annual	Arth	Pollinator	-0.121607	0.122602	0.244209
bio.74	Clough et al 2007B	Germany	Europe	Europe	On Farm	Wheat	Cereals	Annual	Plants	Producer	0.0305367	-2.94444	-2.97498
bio.74	Clough et al 2007B	Germany	Europe	Europe	On Farm	Wheat	Cereals	Annual	Arth	Decomp	0.0492269	0.276253	0.227026
bio.74	Clough et al 2007B	Germany	Europe	Europe	On Farm	Wheat	Cereals	Annual	Arth	Enemy	0.558228	0.0425596	-0.515668
bio.74	Clough et al 2007B	Germany	Europe	Europe	On Farm	Wheat	Cereals	Annual	Arth	Enemy	0.805625	0	-0.805625
bio.77	Cotes et al. 2010a	Spain	Europe	Europe	On Farm	Olive	Oil crops	Perennial	Arth	Enemy	0.441833	NA	NA
bio.78	Crittenden et al 2016	The Netherlands	Europe	Europe	Experiment Station	Wheat	Cereals	Annual	NA	Decomp	0.276253	0.0344964	-0.241757
bio.78	Crittenden et al 2016	The Netherlands	Europe	Europe	Experiment Station	Wheat	Cereals	Annual	NA	Decomp	0.949081	-0.490415	-1.4395
bio.79	Crowder et al. 2010	USA	North America	USA	On Farm	Potato	Root	Annual	Arth	Enemy	-0.0571584	-0.327514	-0.270356
bio.87	Diehl et al 2013	Germany	Europe	Europe	On Farm	Wheat	Cereals	Annual	Plants	Producer	0.287682	NA	NA
bio.88	Diekotter et al. 2010	Germany	Europe	Europe	On Farm	Wheat	Cereals	Annual	Arth	Decomp	0	-0.839821	-0.839821
bio.88	Diekotter et al. 2010	Germany	Europe	Europe	On Farm	Wheat	Cereals	Annual	Arth	Enemy	0.0382822	0.492855	0.454573
bio.88	Diekotter et al. 2010	Germany	Europe	Europe	On Farm	Wheat	Cereals	Annual	Arth	Herbivore	0.342945	1.37444	1.03149
bio.89	Doles et al. 2001	USA	North America	USA	On Farm	Apple	Fruits	Perennial	Arth	Decomp	0.114629	0.355428	0.240799
bio.92	Doring et al. 2003	Germany	Europe	Europe	On Farm	Cereals	Cereals	Annual	Arth	Enemy	0.214999	0.303171	0.0881722
bio.92	Doring et al. 2003	Germany	Europe	Europe	On Farm	Cereals	Cereals	Annual	Arth	Enemy	0.29701	-0.565317	-0.862327
bio.92	Doring et al. 2003	Germany	Europe	Europe	On Farm	Cereals	Cereals	Annual	Plants	Producer	0.639745	-0.181687	-0.821432
bio.92	Doring et al. 2003	Germany	Europe	Europe	On Farm	Cereals	Cereals	Annual	Plants	Producer	0.935409	0.047178	-0.888231
bio.95	Dritscholi & Erwin 1982	USA	North America	USA	On Farm	Corn	Cereals	Annual	Arth	Enemy	0.595983	0.63716	0.0411769
bio.96	Dritschilo & Wanner 1980	USA	North America	USA	On Farm	Corn	Cereals	Annual	Arth	Enemy	0.546885	0	-0.546885

## Sheet: Soil
pub.id	study.name	country	continent	EU_US	study.type	crop	crop.type	annual.perennial	SOC_RR	SOC_sd_RR	SOC_CV_RR	C_stock_RR	C_stock_sd_RR	C_stock_CV_RR
soil.1	Andrews et al. 2002	USA	North America	USA	On Farm	Multi	Vegetables	Annual	0.491594	NA	NA	0.497312	NA	NA
soil.10	Ciavatta et al. 2008	Italy	Europe	Europe	On Farm	Pear	Fruits	Perennial	0.119347	NA	NA	0.111103	NA	NA
soil.10	Ciavatta et al. 2008	Italy	Europe	Europe	On Farm	Pear	Fruits	Perennial	0.638087	NA	NA	0.572141	NA	NA
soil.11	Clark et al 1998	USA	North America	USA	Experiment Station	Multi	Multi	Annual	0.049182	NA	NA	0.049182	NA	NA
soil.11	Clark et al 1998	USA	North America	USA	Experiment Station	Multi	Multi	Annual	0.0805325	NA	NA	0.0805325	NA	NA
soil.11	Clark et al 1998	USA	North America	USA	Experiment Station	Multi	Multi	Annual	0.113995	NA	NA	0.113995	NA	NA
soil.12	Delate and Cambardella 2004	USA	North America	USA	Experiment Station	Multi	Multi	Annual	0.0316232	NA	NA	0.0234599	NA	NA
soil.12	Delate and Cambardella 2004	USA	North America	USA	Experiment Station	Multi	Multi	Annual	0.0470675	NA	NA	0.0306737	NA	NA
soil.12	Delate and Cambardella 2004	USA	North America	USA	Experiment Station	Multi	Multi	Annual	0.0547011	NA	NA	0.0708305	NA	NA
soil.13	Deria et al. 2003	Australia	Zealandia	NA	On Farm	Wheat	Cereals	Annual	-0.300105	NA	NA	-0.286937	NA	NA
soil.13	Deria et al. 2003	Australia	Zealandia	NA	On Farm	Wheat	Cereals	Annual	-0.212175	NA	NA	-0.200112	NA	NA
soil.13	Deria et al. 2003	Australia	Zealandia	NA	On Farm	Wheat	Cereals	Annual	-0.133531	NA	NA	-0.131592	NA	NA
soil.13	Deria et al. 2003	Australia	Zealandia	NA	On Farm	Wheat	Cereals	Annual	-0.0430174	NA	NA	-0.0394112	NA	NA
soil.13	Deria et al. 2003	Australia	Zealandia	NA	On Farm	Wheat	Cereals	Annual	0.0370413	NA	NA	0.0351724	NA	NA
soil.13	Deria et al. 2003	Australia	Zealandia	NA	On Farm	Wheat	Cereals	Annual	0.0833816	NA	NA	0.0778679	NA	NA
soil.13	Deria et al. 2003	Australia	Zealandia	NA	On Farm	Wheat	Cereals	Annual	0.0879688	NA	NA	0.0746151	NA	NA
soil.14	Derrick & Dumaresq 1999	Australia	Zealandia	NA	On Farm	Multi	Multi	Annual	0.122962	0.324736	0.201774	0.110574	NA	NA
soil.15	Diez et al. 1991	Germany	Europe	Europe	NA	NA	NA	NA	0.142563	NA	NA	0.126037	NA	NA
soil.16	Dilly et al., 2001	Germany	Europe	Europe	Experiment Station	NA	NA	Annual	0	NA	NA	0	NA	NA
soil.16	Dilly et al., 2001	Germany	Europe	Europe	Experiment Station	NA	NA	NA	0	NA	NA	0	NA	NA
soil.17	Droogers & Bouma 1996	The Netherlands	Europe	Europe	On Farm	Multi	Multi	Annual	-0.207639	NA	NA	-0.188095	NA	NA
soil.17	Droogers & Bouma 1996	The Netherlands	Europe	Europe	On Farm	NA	NA	NA	0.0984401	NA	NA	0.0468157	NA	NA
soil.17	Droogers & Bouma 1996	The Netherlands	Europe	Europe	On Farm	Multi	Multi	Annual	0.1425	NA	NA	0.129428	NA	NA
soil.17	Droogers & Bouma 1996	The Netherlands	Europe	Europe	On Farm	NA	NA	NA	0.662376	NA	NA	0.528844	NA	NA
soil.18	Efthimiadou et al. 2010	Greece	Europe	Europe	On Farm	Bean	Pulses	Annual	-0.319602	0.203228	0.52283	-0.463736	NA	NA
soil.18	Efthimiadou et al. 2010	Greece	Europe	Europe	On Farm	Bean	Pulses	Annual	-0.312885	0.499494	0.812379	-0.464801	NA	NA
soil.19	Eltun et al 2002	Norway	Europe	Europe	Experiment Station	Multi	Multi	Annual	-0.329806	NA	NA	-0.263806	NA	NA
soil.19	Eltun et al 2002	Norway	Europe	Europe	Experiment Station	Multi	Multi	Annual	-0.295789	NA	NA	-0.237421	NA	NA
soil.19	Eltun et al 2002	Norway	Europe	Europe	Experiment Station	Multi	Multi	Annual	-0.109643	NA	NA	-0.0882595	NA	NA
soil.19	Eltun et al 2002	Norway	Europe	Europe	Experiment Station	Multi	Multi	Annual	0.1135	NA	NA	0.0932845	NA	NA
soil.2	Armstrong et al. 2000	UK	Europe	Europe	On Farm	NA	NA	Annual	-0.117548	0.478999	0.596547	-0.0913285	NA	NA
soil.2	Armstrong et al. 2000	UK	Europe	Europe	On Farm	NA	NA	Annual	0.294239	0.638813	0.344573	0.244796	NA	NA
soil.2	Armstrong et al. 2000	UK	Europe	Europe	On Farm	NA	NA	Annual	0.455476	1.01309	0.557615	0.383428	NA	NA
soil.20	Eyhorn et al. 2007	India	Asia	NA	On Farm	Cotton	Fiber	Annual	0.0224729	NA	NA	0.0206632	NA	NA
soil.21	Fraser et al 1988	USA	North America	USA	Experiment Station	Multi	Multi	Annual	0.161591	NA	NA	0.161591	NA	NA
soil.21	Fraser et al 1988	USA	North America	USA	Experiment Station	Multi	Multi	Annual	0.175174	NA	NA	0.175174	NA	NA
soil.21	Fraser et al 1988	USA	North America	USA	Experiment Station	Multi	Multi	Annual	0.201149	NA	NA	0.201149	NA	NA
soil.22	Friedel et al 2000	Germany	Europe	Europe	Experiment Station	Multi	Multi	Annual	0.102191	0.117783	0.0155921	0.102191	0.102191	-1.11e-16
soil.23	Garcia-Ruizet al 2009	Spain	Europe	Europe	On Farm	Olive	Oil crops	Perennial	0.319319	0	-0.319319	0.256882	NA	NA
soil.23	Garcia-Ruizet al 2009	Spain	Europe	Europe	On Farm	Olive	Oil crops	Perennial	0.410633	0.0392207	-0.371412	0.332704	NA	NA
soil.23	Garcia-Ruizet al 2009	Spain	Europe	Europe	On Farm	Olive	Oil crops	Perennial	0.425754	0.074108	-0.351646	0.309078	NA	NA
soil.24	Gardner & Glancy, 1996	USA	North America	USA	On Farm	Multi	Multi	Annual	-0.279405	NA	NA	-0.131769	NA	NA
soil.24	Gardner & Glancy, 1996	USA	North America	USA	On Farm	Multi	Multi	Annual	-0.248124	-0.653589	-0.405465	-0.194057	-0.599522	-0.405465
soil.24	Gardner & Glancy, 1996	USA	North America	USA	On Farm	Multi	Multi	Annual	-0.212185	0.19328	0.405465	-0.260041	0.145424	0.405465
soil.24	Gardner & Glancy, 1996	USA	North America	USA	On Farm	Multi	Multi	Annual	-0.0826889	0.0350942	0.117783	-0.21989	-0.102107	0.117783
soil.24	Gardner & Glancy, 1996	USA	North America	USA	On Farm	Multi	Multi	Annual	0.282055	-0.12341	-0.405465	0.123703	-0.281762	-0.405465
soil.24	Gardner & Glancy, 1996	USA	North America	USA	On Farm	Multi	Multi	Annual	0.402598	1.70188	1.29928	0.38318	1.68246	1.29928
soil.25	Ge et al., 2011	China	Asia	NA	On Farm	Multi	Multi	Annual	0.76214	2.25129	1.48915	0.698961	-1.24695	-1.94591
soil.26	Gehrhardt 1997	USA	North America	USA	On Farm	Multi	Multi	Annual	1.11739	NA	NA	0.917265	NA	NA
soil.27	Glover et al. 2000	USA	North America	USA	On Farm	Apple	Fruits	Perennial	0.112786	0.374358	0.261572	-0.0444518	0.428887	0.473339
soil.27	Glover et al. 2000	USA	North America	USA	On Farm	Apple	Fruits	Perennial	0.333453	0.609533	0.27608	0.127646	0.530966	0.403321
soil.28	Gosling & Shepherd 2005	UK	Europe	Europe	On Farm	Multi	Multi	Annual	0.0490562	0.252584	0.203528	0.0405449	NA	NA
soil.28	Gosling & Shepherd 2005	UK	Europe	Europe	On Farm	Multi	Multi	Annual	0.145333	0.35278	0.207447	0.119088	NA	NA
soil.29	Grandy & Robertson 2007	USA	North America	USA	Experiment Station	Multi	Multi	Annual	-0.140147	-0.693147	-0.553001	-0.140497	-0.180508	-0.0400116
soil.29	Grandy & Robertson 2007	USA	North America	USA	Experiment Station	Multi	Multi	Annual	0.0360399	-0.223144	-0.259183	0.0547899	0.0331522	-0.0216377
soil.29	Grandy & Robertson 2007	USA	North America	USA	Experiment Station	Multi	Multi	Annual	0.216528	-0.693147	-0.909675	0.21376	-0.105143	-0.318903
soil.3	Benitez et al. 2006	Spain	Europe	Europe	On Farm	Olive	Oil crops	Perennial	-0.194296	-0.736822	-0.542526	-0.17093	NA	NA
soil.3	Benitez et al. 2006	Spain	Europe	Europe	On Farm	Olive	Oil crops	Perennial	-0.184023	0.074108	0.258131	-0.161795	NA	NA
soil.3	Benitez et al. 2006	Spain	Europe	Europe	On Farm	Olive	Oil crops	Perennial	-0.163974	-0.67306	-0.509086	-0.152844	NA	NA
soil.3	Benitez et al. 2006	Spain	Europe	Europe	On Farm	Olive	Oil crops	Perennial	-0.0465561	-0.311939	-0.265383	-0.0393134	NA	NA
soil.3	Benitez et al. 2006	Spain	Europe	Europe	On Farm	Olive	Oil crops	Perennial	-0.0362834	0.498991	0.535275	-0.0301783	NA	NA
soil.3	Benitez et al. 2006	Spain	Europe	Europe	On Farm	Olive	Oil crops	Perennial	0.0989719	0.24686	0.147888	0.0928005	NA	NA
soil.3	Benitez et al. 2006	Spain	Europe	Europe	On Farm	Olive	Oil crops	Perennial	0.152973	0.248896	0.0959233	0.138663	NA	NA
soil.3	Benitez et al. 2006	Spain	Europe	Europe	On Farm	Olive	Oil crops	Perennial	0.167343	0.074108	-0.093235	0.150211	NA	NA
soil.3	Benitez et al. 2006	Spain	Europe	Europe	On Farm	Olive	Oil crops	Perennial	0.177616	0.885038	0.707423	0.159346	NA	NA
soil.3	Benitez et al. 2006	Spain	Europe	Europe	On Farm	Olive	Oil crops	Perennial	0.415919	1.16882	0.752898	0.384308	NA	NA
soil.30	Granstedt et al 2008	Sweden	Europe	Europe	Experiment Station	Multi	Multi	Annual	-0.0483186	0.940983	0.989302	-0.0783604	0.951173	1.02953
soil.30	Granstedt et al 2008	Sweden	Europe	Europe	Experiment Station	Multi	Multi	Annual	0.134531	0.870918	0.736388	0.104654	0.707133	0.60248
soil.31	Haggar et al. 2011	Nicaragua	South America	NA	On Farm	Coffee	Beverage	Perennial	-0.105361	NA	NA	-0.0642233	NA	NA
soil.31	Haggar et al. 2011	Nicaragua	South America	NA	On Farm	Coffee	Beverage	Perennial	-0.0404467	NA	NA	-0.0249308	NA	NA
soil.31	Haggar et al. 2011	Costa Rica	South America	NA	On Farm	Coffee	Beverage	Perennial	0.0396563	NA	NA	0.0291447	NA	NA
soil.31	Haggar et al. 2011	Costa Rica	South America	NA	On Farm	Coffee	Beverage	Perennial	0.0491097	NA	NA	0.0363915	NA	NA
soil.31	Haggar et al. 2011	Costa Rica	South America	NA	On Farm	Coffee	Beverage	Perennial	0.0645385	NA	NA	0.0470297	NA	NA
soil.31	Haggar et al. 2011	Costa Rica	South America	NA	On Farm	Coffee	Beverage	Perennial	0.0717879	NA	NA	0.054767	NA	NA
soil.31	Haggar et al. 2011	Nicaragua	South America	NA	On Farm	Coffee	Beverage	Perennial	0.0876752	NA	NA	0.0547898	NA	NA
soil.31	Haggar et al. 2011	Costa Rica	South America	NA	On Farm	Coffee	Beverage	Perennial	0.140247	NA	NA	0.105425	NA	NA
soil.31	Haggar et al. 2011	Costa Rica	South America	NA	On Farm	Coffee	Beverage	Perennial	0.144948	NA	NA	0.106966	NA	NA
soil.32	Heitkamp et al. 2009	Germany	Europe	Europe	On Farm	Multi	Multi	Annual	0.113043	0.113043	0	0.0695577	0.405465	0.335907
soil.32	Heitkamp et al. 2009	Germany	Europe	Europe	On Farm	Multi	Multi	Annual	0.127438	0.820585	0.693147	0.149417	0.587787	0.43837
soil.32	Heitkamp et al. 2009	Germany	Europe	Europe	On Farm	Multi	Multi	Annual	0.163022	0.163022	0	0.170295	0.105361	-0.064934
soil.33	Hepperly et al 2006	USA	North America	USA	Experiment Station		NA	NA	0.182322	NA	NA	0.182322	NA	NA
soil.33	Hepperly et al 2006	USA	North America	USA	Experiment Station		NA	NA	0.223144	NA	NA	0.223144	NA	NA
soil.34	Herencia Galan et al. 2011	Spain	Europe	Europe	Experiment Station	Multi	Multi	Annual	0.800778	NA	NA	0.682062	NA	NA
soil.35	Kahle et al 2005	Germany	Europe	Europe	Experiment Station	NA	NA	NA	0.0431158	NA	NA	0.0836619	NA	NA
soil.36	Kirchmann et al 2007	Sweden	Europe	Europe	On Farm	Multi	Multi	Annual	0.0967873	0.502252	0.405465	0.0771741	NA	NA
soil.37	Kong et al 2005	USA	North America	USA	Experiment Station	Multi	Multi	Annual	0.253196	NA	NA	0.253196	NA	NA
soil.37	Kong et al. 2005	USA	North America	USA	Experiment Station	Multi	Multi	Annual	0.287682	NA	NA	0.287682	NA	NA
soil.37	Kong et al. 2005	USA	North America	USA	Experiment Station	Multi	Multi	Annual	0.299447	NA	NA	0.299447	NA	NA
soil.38	Kramer et al. 2006	USA	North America	USA	On Farm	Apple	Fruits	Perennial	0.0923733	NA	NA	0.0779002	NA	NA
soil.38	Kramer et al. 2006	USA	North America	USA	On Farm	Apple	Fruits	Perennial	0.421774	NA	NA	0.364104	NA	NA
soil.39	Leifeld et al. 2009	Switzerland	Europe	Europe	Experiment Station	Multi	Multi	Annual	-0.0594234	NA	NA	0.0105264	-0.182322	-0.192848
soil.39	Leifeld et al. 2009	Switzerland	Europe	Europe	Experiment Station	Multi	Multi	Annual	0.0298282	NA	NA	0.0648876	0.430783	0.365895
soil.39	Leifeld et al. 2009	Switzerland	Europe	Europe	Experiment Station	Multi	Multi	Annual	0.0303053	NA	NA	0.107739	0.223144	0.115405
soil.39	Leifeld et al. 2009	Switzerland	Europe	Europe	Experiment Station	Multi	Multi	Annual	0.119557	NA	NA	0.1621	0.836248	0.674148
soil.4	Blaise 2006	India	Asia	NA	Experiment Station	Cotton	Fiber	Annual	0.551497	NA	NA	0.51567	NA	NA
soil.40	Leite et al. 2010	Brazil	South America	NA	On Farm	Watermelon	Fruits	Annual	0.279452	NA	NA	0.279452	NA	NA
soil.40	Leite et al. 2010	Brazil	South America	NA	On Farm	Watermelon	Fruits	Annual	0.324152	NA	NA	0.324152	NA	NA
soil.41	Liebig & Doran 1999	USA	North America	USA	On Farm	Multi	Multi	Annual	0.102824	NA	NA	0.0412664	NA	NA
soil.41	Liebig & Doran 1999	USA	North America	USA	On Farm	Multi	Multi	Annual	0.129887	NA	NA	0.122718	NA	NA
soil.41	Liebig & Doran 1999	USA	North America	USA	On Farm	Multi	Multi	Annual	0.268206	NA	NA	0.234869	NA	NA
soil.41	Liebig & Doran 1999	USA	North America	USA	On Farm	Multi	Multi	Annual	0.434005	NA	NA	0.303385	NA	NA
soil.41	Liebig & Doran 1999	USA	North America	USA	On Farm	Multi	Multi	Annual	0.531387	NA	NA	0.308243	NA	NA
soil.42	Lytton-Hitchins et al 1994	Australia	Zealandia	NA	On Farm	NA	NA	Perennial	0.171177	NA	NA	0.111358	NA	NA
soil.43	Marinari et al. 2010b	Italy	Europe	Europe	On Farm	Multi	Multi	Annual	-0.652873	0.117783	0.770656	0.590752	NA	NA
soil.43	Marinari et al 2010b	Italy	Europe	Europe	On Farm	Multi	Multi	Annual	0.0986715	0.485508	0.386836	0.0771354	NA	NA
soil.44	Marinari et al. 2010a	Italy	Europe	Europe	Experiment Station	Multi	Multi	Annual	0.160682	-0.510826	-0.671508	0.143937	NA	NA
soil.45	Mazzoncini et al 2010	Italy	Europe	Europe	Experiment Station	Multi	Multi	Annual	0.197168	NA	NA	0.181751	NA	NA
soil.46	Melero et al 2007	Spain	Europe	Europe	On Farm	Multi	Multi	Annual	0.268814	NA	NA	0.239856	NA	NA
soil.46	Melero et al 2007	Spain	Europe	Europe	On Farm	Multi	Multi	Annual	0.357609	NA	NA	0.317471	NA	NA
soil.47	Moeskops et al 2010	Indonesia	Asia	NA	On Farm	Multi	Multi	Annual	-0.0663751	0.154151	0.220526	-0.0249899	0.195536	0.220526
soil.47	Moeskops et al 2010	Indonesia	Asia	NA	On Farm	Multi	Multi	Annual	-0.022285	1.44692	1.4692	-0.0609996	1.4082	1.4692
soil.47	Moeskops et al 2010	Indonesia	Asia	NA	On Farm	Multi	Multi	Annual	0.416213	1.20397	0.787759	0.3527	1.14046	0.787759
soil.47	Moeskops et al 2010	Indonesia	Asia	NA	On Farm	Multi	Multi	Annual	0.496062	3.56953	3.07347	0.421954	3.49542	3.07347
soil.47	Moeskops et al 2010	Indonesia	Asia	NA	On Farm	Multi	Multi	Annual	0.506449	1.5506	1.04415	0.464485	1.50863	1.04415
soil.47	Moeskops et al 2010	Indonesia	Asia	NA	On Farm	Multi	Multi	Annual	0.596223	-1.13943	-1.73566	0.50793	-1.22773	-1.73566
soil.48	Mulla et al 1992	USA	North America	USA	On Farm	Multi	Multi	Annual	0.262364	NA	NA	0.235842	NA	NA
soil.48	Mulla et al 1992	USA	North America	USA	On Farm	Multi	Multi	Annual	0.405465	NA	NA	0.377971	NA	NA
soil.48	Mulla et al 1992	USA	North America	USA	On Farm	Multi	Multi	Annual	0.546544	NA	NA	0.477917	NA	NA
soil.49	Murata & Goh, 1997	New Zealand	Zealandia	NA	On Farm	Multi	Multi	Annual	0.0276941	0.69317	0.665476	0.0209836	NA	NA
soil.49	Murata & Goh, 1997	New Zealand	Zealandia	NA	On Farm	Multi	Multi	Annual	0.0277697	0.714883	0.687114	0.0210044	NA	NA
soil.5	Blakemore 2000	UK	Europe	Europe	On Farm	Multi	Multi	Annual	0.536143	0	-0.536143	0.572511	0.0369928	-0.535518
soil.5	Blakemore 2000	UK	Europe	Europe	On Farm	Multi	Multi	Annual	0.826679	1.09861	0.271934	0.603535	0.891217	0.287682
soil.50	N. Monokrousos et al. 2006	Greece	Europe	Europe	On Farm	Asparagus	Vegetables	Perennial	-0.505331	-0.505331	-1.11e-16	-0.439745	NA	NA
soil.50	N. Monokrousos et al. 2006	Greece	Europe	Europe	On Farm	Asparagus	Vegetables	Perennial	-0.330601	-0.330601	0	-0.284506	NA	NA
soil.50	N. Monokrousos et al. 2006	Greece	Europe	Europe	On Farm	Asparagus	Vegetables	Perennial	-0.271966	-0.271966	0	-0.233115	NA	NA
soil.51	Nguyen et al 1995	New Zealand	Zealandia	NA	On Farm	Multi	Multi	Annual	-0.029853	-0.451985	-0.422132	-0.0224521	NA	NA
soil.51	Nguyen et al 1995	New Zealand	Zealandia	NA	On Farm	Multi	Multi	Annual	0	0.0953102	0.0953102	0	NA	NA
soil.51	Nguyen et al 1995	New Zealand	Zealandia	NA	On Farm	NA	NA	Annual	0.0289875	-1.54045	-1.56943	0.021641	NA	NA
soil.51	Nguyen et al 1995	New Zealand	Zealandia	NA	On Farm	NA	NA	Annual	0.0317487	-0.693147	-0.724896	0.0242366	NA	NA
soil.51	Nguyen et al 1995	New Zealand	Zealandia	NA	On Farm	Multi	Multi	Annual	0.0339016	0.117783	0.0838815	0.0262749	NA	NA
soil.51	Nguyen et al 1995	New Zealand	Zealandia	NA	On Farm	NA	NA	Annual	0.108214	0.336472	0.228259	0.0793556	NA	NA
soil.52	Oberholzer et al 2000	Switzerland	Europe	Europe	On Farm	Wheat	Cereals	Annual	0.00451468	NA	NA	0.00370673	NA	NA
soil.53	Okur et al. 2009	Turkey	Europe	Europe	On Farm	Grapes	Fruits	Perennial	0.0392207	NA	NA	0.0364752	NA	NA
soil.54	Pardo et al. 2009	Spain	Europe	Europe	On Farm	Multi	Cereals	Annual	-0.00615387	NA	NA	-0.00530547	NA	NA
soil.54	Pardo et al. 2009	Spain	Europe	Europe	On Farm	Multi	Cereals	Annual	0.0498324	NA	NA	0.0437806	NA	NA
soil.55	Petersen et al 1997	Denmark	Europe	Europe	On Farm	Multi	Cereals	Annual	0.00732604	NA	NA	0.00645851	NA	NA
soil.55	Petersen et al 1997	Denmark	Europe	Europe	On Farm	Multi	Cereals	Annual	0.0679507	NA	NA	0.0601156	NA	NA
soil.55	Petersen et al 1997	Denmark	Europe	Europe	On Farm	Multi	Cereals	Annual	0.223144	NA	NA	0.194062	NA	NA
soil.55	Petersen et al 1997	Denmark	Europe	Europe	On Farm	Multi	Cereals	Annual	0.283768	NA	NA	0.247719	NA	NA
soil.55	Petersen et al 1997	Denmark	Europe	Europe	On Farm	Multi	Cereals	Annual	0.405465	NA	NA	0.348123	NA	NA
soil.55	Petersen et al 1997	Denmark	Europe	Europe	On Farm	Multi	Cereals	Annual	0.405465	NA	NA	0.348123	NA	NA
soil.55	Petersen et al 1997	Denmark	Europe	Europe	On Farm	Multi	Cereals	Annual	0.46609	NA	NA	0.40178	NA	NA
soil.55	Petersen et al 1997	Denmark	Europe	Europe	On Farm	Multi	Cereals	Annual	0.46609	NA	NA	0.40178	NA	NA
soil.56	Phillips 2007	USA	North America	USA	On Farm	Multi	Multi	Annual	0.0215822	0.203904	0.182322	0.0672522	0.364028	0.296776
soil.57	Probst et al. 2008	France	Europe	Europe	On Farm	Grapes	Fruits	Perennial	-0.481718	-0.80866	-0.326943	-0.37386	-0.892637	-0.518777
soil.57	Probst et al. 2008	France	Europe	Europe	On Farm	Grapes	Fruits	Perennial	-0.463663	-0.554311	-0.0906474	-0.381636	0.14723	0.528866
soil.57	Probst et al. 2008	France	Europe	Europe	On Farm	Grapes	Fruits	Perennial	-0.451985	-1.21502	-0.763038	-0.423805	-1.39266	-0.968852
soil.57	Probst et al. 2008	France	Europe	Europe	On Farm	Grapes	Fruits	Perennial	-0.269824	-1.02664	-0.756814	-0.114536	-0.333328	-0.218792
soil.57	Probst et al. 2008	France	Europe	Europe	On Farm	Grapes	Fruits	Perennial	0.00749067	-0.855666	-0.863157	-0.0274568	-0.174353	-0.146897
soil.57	Probst et al. 2008	France	Europe	Europe	On Farm	Grapes	Fruits	Perennial	0.218733	1.02962	0.810887	0.119043	-0.0297894	-0.148833
soil.57	Probst et al. 2008	France	Europe	Europe	On Farm	Grapes	Fruits	Perennial	0.291806	-0.392042	-0.683848	0.278134	-0.0601488	-0.338283
soil.57	Probst et al. 2008	France	Europe	Europe	On Farm	Grapes	Fruits	Perennial	0.395834	0.356675	-0.0391593	0.387997	0.267879	-0.120118
soil.58	Pulleman et al 2003	The Netherlands	Europe	Europe	On Farm	Grass	Forage	Annual/perennial	0.445767	0.0606246	-0.385143	0.401357	NA	NA
soil.59	Purin et al. 2006	Brazil	South America	NA	On Farm	Apple	Fruits	Perennial	0.105361	0	-0.105361	0.101566	NA	NA
soil.6	Campos-Herrera et al. 2010	Spain	Europe	Europe	On Farm	Apple	Fruits	Perennial	0.00569802	NA	NA	0.00485888	NA	NA
soil.6	Campos-Herrera et al. 2010	Spain	Europe	Europe	On Farm	Multi	Multi	Annual	0.0198026	NA	NA	0.0172335	NA	NA
soil.6	Campos-Herrera et al. 2010	Spain	Europe	Europe	On Farm	Grapes	Fruits	Perennial	0.199713	NA	NA	0.180991	NA	NA
soil.60	Qin et al. 2010	China	Asia	NA	Experiment Station	Rice	Cereals	Annual	-0.155241	NA	NA	-0.136245	NA	NA
soil.61	Rasul and Thapa 2004	Bangladesh	Asia	NA	On Farm	Rice	Cereals	Annual	0.76214	NA	NA	0.697555	NA	NA
soil.62	Reganold et al 1993	New Zealand	Zealandia	NA	On Farm	Multi	Multi	NA	-0.229985	NA	NA	-0.162974	NA	NA
soil.62	Reganold et al 1993	New Zealand	Zealandia	NA	On Farm	Dairy	Other	Perennial	-0.107033	NA	NA	-0.261183	NA	NA
soil.62	Reganold et al 1993	New Zealand	Zealandia	NA	On Farm	Citrus	Fruits	Perennial	0.149532	NA	NA	0.110311	NA	NA
soil.62	Reganold et al 1993	New Zealand	Zealandia	NA	On Farm	Dairy	Other	Perennial	0.179903	NA	NA	0.0870094	NA	NA
soil.62	Reganold et al 1993	New Zealand	Zealandia	NA	On Farm	Multi	Fruits	Perennial	0.218457	NA	NA	0.0143619	NA	NA
soil.62	Reganold et al 1993	New Zealand	Zealandia	NA	On Farm	Livestock	Other	NA	0.247591	NA	NA	0.264686	NA	NA
soil.62	Reganold et al 1993	New Zealand	Zealandia	NA	On Farm	Multi	Vegetables	Annual	0.3402	NA	NA	0.236659	NA	NA
soil.63	Reganold et al. 2010	USA	North America	USA	On Farm	Strawberry	Fruits	Annual	0.196364	NA	NA	0.180203	NA	NA
soil.63	Reganold et al. 2010	USA	North America	USA	On Farm	Strawberry	Fruits	Annual	0.201378	NA	NA	0.185768	NA	NA
soil.64	Romanya and Rovira 2009	Spain	Europe	Europe	On Farm	Barley	Cereals	Annual	-0.12189	-0.530628	-0.408738	-0.11275	NA	NA
soil.64	Romanya and Rovira 2009	Spain	Europe	Europe	On Farm	Wheat	Cereals	Annual	0.27691	0.167054	-0.109856	0.253664	NA	NA
soil.65	Rühling et al. 2005	Germany	Europe	Europe	NA	NA	NA	NA	0.10616	NA	NA	0.115069	NA	NA
soil.66	Schjønning et al. 2002	Denmark	Europe	Europe	On Farm	Multi	Multi	Annual	-0.169496	NA	NA	-0.169496	NA	NA
soil.66	Schjønning et al. 2002	Denmark	Europe	Europe	On Farm	Multi	Multi	Annual	-0.0658541	NA	NA	0.00128518	NA	NA
soil.66	Schjønning et al. 2002	Denmark	Europe	Europe	On Farm	Multi	Multi	Annual	0.107753	NA	NA	0.107753	NA	NA
soil.66	Schjønning et al. 2002	Denmark	Europe	Europe	On Farm	Multi	Multi	Annual	0.383479	NA	NA	0.292187	NA	NA
soil.67	Sehy 2004	Germany	Europe	Europe	NA	NA	NA	NA	-0.0117353	-2.3979	-2.38616	0.0322085	-2.17716	-2.20937
soil.68	Snapp et al 2010	USA	North America	USA	Experiment Station	Multi	Multi	Annual	0.306063	NA	NA	0.269159	NA	NA
soil.69	Teasdale et al. 2007	USA	North America	USA	Experiment Station	Multi	Multi	Annual	0.191171	NA	NA	0.186747	NA	NA
soil.69	Teasdale et al. 2007	USA	North America	USA	Experiment Station	Multi	Multi	Annual	0.298014	NA	NA	0.280114	NA	NA
soil.69	Teasdale et al. 2007	USA	North America	USA	Experiment Station	Multi	Multi	Annual	0.322039	NA	NA	0.288678	NA	NA
soil.7	Canali et al. 2009	Italy	Europe	Europe	On Farm	Citrus	Fruits	Perennial	0.218791	NA	NA	0.199587	NA	NA
soil.70	Van Diepeningen et al. 2006	The Netherlands	Europe	Europe	On Farm	Multi	Multi	Annual	0.00591426	NA	NA	-0.117672	NA	NA
soil.70	Van Diepeningen et al. 2006	The Netherlands	Europe	Europe	On Farm	Multi	Multi	Annual	0.108819	NA	NA	0.0860907	NA	NA
soil.71	Vavoulidou et al. 2009	Greece	Europe	Europe	On Farm	Multi	Multi	Perennial	-0.312788	-1.26976	-0.956973	-0.259744	NA	NA
soil.71	Vavoulidou et al. 2009	Greece	Europe	Europe	On Farm	Multi	Multi	Perennial	-0.230312	-0.438255	-0.207943	-0.199624	NA	NA
soil.71	Vavoulidou et al. 2009	Greece	Europe	Europe	On Farm	Multi	Multi	Perennial	-0.0382212	0.241162	0.279383	-0.0354807	NA	NA
soil.71	Vavoulidou et al. 2009	Greece	Europe	Europe	On Farm	Multi	Multi	Perennial	0.0363676	-0.616186	-0.652554	0.031288	NA	NA
soil.71	Vavoulidou et al. 2009	Greece	Europe	Europe	On Farm	Multi	Multi	Perennial	0.310553	-0.635989	-0.946542	0.288277	NA	NA
soil.72	Wang et al. 2011	USA	North America	USA	Experiment Station	Multi	Multi	Annual	0.182322	NA	NA	0.169515	NA	NA
soil.72	Wang et al. 2011	USA	North America	USA	Experiment Station	Multi	Multi	Annual	0.283768	NA	NA	0.247719	NA	NA
soil.72	Wang et al. 2011	USA	North America	USA	Experiment Station	Multi	Multi	Annual	0.887303	NA	NA	0.799233	NA	NA
soil.73	Wells et al 2000	Australia	Zealandia	NA	Experiment Station	Multi	Multi	Annual	-0.112363	NA	NA	-0.0942135	NA	NA
soil.73	Wells et al 2000	Australia	Zealandia	NA	Experiment Station	Multi	Multi	Annual	0.21641	NA	NA	0.185981	NA	NA
soil.73	Wells et al 2000	Australia	Zealandia	NA	Experiment Station	Multi	Multi	Annual	0.257511	NA	NA	0.22192	NA	NA
soil.73	Wells et al 2000	Australia	Zealandia	NA	Experiment Station	Multi	Multi	Annual	0.449671	NA	NA	0.392277	NA	NA
soil.74	Welsh et al. 2009	Canada	North America	NA	Experiment Station	Multi	Multi	Annual	-0.0717242	0.882389	0.954113	-0.0513109	NA	NA
soil.74	Welsh et al. 2009	Canada	North America	NA	Experiment Station	Multi	Multi	Annual	0	0.482852	0.482852	0	NA	NA
soil.74	Welsh et al. 2009	Canada	North America	NA	Experiment Station	Multi	Multi	Annual	0	1.11803	1.11803	0	NA	NA
soil.8	Capriel 1991	Germany	Europe	Europe	NA	NA	NA	NA	-0.00981056	0.769778	0.779588	-0.0042083	0.77538	0.779588
soil.8	Capriel 1991	Germany	Europe	Europe	NA	NA	NA	NA	0.0757774	-0.887478	-0.963255	0.0235917	-0.939663	-0.963255
soil.8	Capriel 1991	Germany	Europe	Europe	NA	NA	NA	NA	0.127133	0.643977	0.516844	0.110872	0.627717	0.516844
soil.8	Capriel 1991	Germany	Europe	Europe	NA	NA	NA	NA	0.135616	-0.0485522	-0.184168	0.106961	-0.0772075	-0.184168
soil.8	Capriel 1991	Germany	Europe	Europe	NA	NA	NA	NA	0.176374	-0.275866	-0.45224	0.203476	-0.248764	-0.45224
soil.9	Chirinda et al. 2010	Denmark	Europe	Europe	Experiment Station	Multi	Multi	Annual	0.0721963	0	-0.0721963	0.0721963	0.0721963	0
soil.9	Chirinda et al. 2010	Denmark	Europe	Europe	Experiment Station	Multi	Multi	Annual	0.16508	NA	NA	0.16508	0.858227	0.693147
soil.9	Chirinda et al. 2010	Denmark	Europe	Europe	Experiment Station	Multi	Multi	Annual	0.197168	NA	NA	0.197168	0.756784	0.559616
soil.9	Chirinda et al. 2010	Denmark	Europe	Europe	Experiment Station	Multi	Multi	Annual	0.238411	NA	NA	0.238411	0.798027	0.559616
soil.9	Chirinda et al. 2010	Denmark	Europe	Europe	Experiment Station	Multi	Multi	Annual	0.245355	-1.09861	-1.34397	0.245355	-1.05393	-1.29928
soil.9	Chirinda et al. 2010	Denmark	Europe	Europe	Experiment Station	Multi	Multi	Annual	0.24953	-1.09861	-1.34814	0.24953	-1.04975	-1.29928

## Sheet: Yield
pub.id	study.name	country	continent	EU_US	study.type	crop	crop.type	annual.perennial	YieldRR	YieldsdRR	CVRR
bio.110	Fischer et al. 2011a	Germany	Europe	Europe	On Farm	Wheat	Cereals	Annual	-0.721978	-0.597003	0.124975
bio.110	Fischer et al. 2011a	Germany	Europe	Europe	On Farm	Wheat	Cereals	Annual	-0.502222	0.751558	1.25378
bio.120	Gabriel et al. 2010	UK	Europe	Europe	On Farm	Cereals	Cereals	Annual	-0.79493	0.167054	0.961984
bio.120	Gabriel et al. 2010	UK	Europe	Europe	On Farm	Cereals	Cereals	Annual	-0.782095	-0.296266	0.485829
bio.126	Galvan et al. 2009	The Netherlands	Europe	Europe	On Farm	Onion	Vegetables	Annual	-0.809306	NA	NA
bio.188	Karlsson et al 2017	Sweden	Europe	Europe	On Farm	Wheat	Cereals	Annual	-0.485508	NA	NA
bio.270	Pelosi et al. 2009	France	Europe	Europe	Experiment Station	Wheat	Cereals	Annual	-0.507248	NA	NA
bio.29	Benargama et al 2016b	Canada	North America	NA	Experiment Station	Wheat	Cereals	Annual	-0.558228	1.80311	2.36134
bio.335	Syswerda & Robertson 2014	USA	North America	USA	Experiment Station	Alfalfa	Forage	Annual/perennial	-0.223144	-0.713766	-0.490623
bio.372	Winqvist et al. 2011	Sweden	Europe	Europe	On Farm	Cereals	Cereals	Annual	-0.608509	NA	NA
profit.10	Dal Ferro et al. 2017	Italy	Europe	Europe	On Farm	Corn	Cereals	Annual	-0.542324	-0.182322	0.360003
profit.10	Dal Ferro et al. 2017	Italy	Europe	Europe	On Farm	Wheat	Cereals	Annual	-0.453197	0	0.453197
profit.10	Dal Ferro et al. 2017	Italy	Europe	Europe	On Farm	Soybean	Oil crops	Annual	0.287682	0	-0.287682
profit.12	Delate et al. 2003	USA	North America	USA	Experiment Station	Soybean	Oil crops	Annual	-1.02202	-0.965739	0.0562813
profit.12	Delate et al. 2003	USA	North America	USA	Experiment Station	Soybean	Oil crops	Annual	-0.959676	-0.714425	0.245251
profit.12	Delate et al. 2003	USA	North America	USA	Experiment Station	Corn	Cereals	Annual	-0.589315	-1.45102	-0.861709
profit.12	Delate et al. 2003	USA	North America	USA	Experiment Station	Corn	Cereals	Annual	-0.569741	-1.09026	-0.520519
profit.13	Delbridge et al. 2011	USA	North America	USA	Experiment Station	Soybean	Oil crops	Annual	-1.02096	-0.359374	0.661587
profit.13	Delbridge et al. 2011	USA	North America	USA	Experiment Station	Soybean	Oil crops	Annual	-1.02096	-0.260283	0.760678
profit.13	Delbridge et al. 2011	USA	North America	USA	Experiment Station	Corn	Cereals	Annual	-0.713575	-0.797287	-0.0837124
profit.13	Delbridge et al. 2011	USA	North America	USA	Experiment Station	Corn	Cereals	Annual	-0.687503	-0.734944	-0.0474415
profit.13	Delbridge et al. 2011	USA	North America	USA	Experiment Station	Oat	Cereals	Annual	-0.596123	-0.420733	0.175391
profit.13	Delbridge et al. 2011	USA	North America	USA	Experiment Station	Alfalfa	Forage	Annual/perennial	0.189941	-0.431389	-0.62133
profit.14	Demiryurek & Ceyhan	Turkey	Europe	Europe	Survey	Hazelnut	Fruits	Perennial	-0.0484479	0.61902	0.667468
profit.15	Eyhorn et al.	India	Asia	NA	Survey	Pepper	Vegetables	Annual	-1.31769	-1.42854	-0.110851
profit.15	Eyhorn et al.	India	Asia	NA	Survey	Pigeon pea	Pulses	Annual	-0.0844736	-0.308113	-0.223639
profit.15	Eyhorn et al.	India	Asia	NA	Survey	Soybean	Oil crops	Annual	-0.0553353	0.131135	0.18647
profit.15	Eyhorn et al.	India	Asia	NA	Survey	Corn	Cereals	Annual	-0.0552796	-0.264649	-0.20937
profit.15	Eyhorn et al.	India	Asia	NA	Survey	Wheat	Cereals	Annual	-0.0542855	-0.045689	0.00859646
profit.15	Eyhorn et al.	India	Asia	NA	Survey	Sorghum	Cereals	Annual	0.0628489	0.255519	0.19267
profit.17	Forster et al. 2013	India	Asia	NA	Experiment Station	Cotton	Fiber	Perennial	-0.211583	0.776825	0.988409
profit.17	Forster et al. 2013	India	Asia	NA	Experiment Station	Wheat	Cereals	Annual	-0.159181	0.575087	0.734268
profit.17	Forster et al. 2013	India	Asia	NA	Experiment Station	Soybean	Oil crops	Annual	-0.0756419	-0.28752	-0.211878
profit.18	Gleissmann et al. 1996	USA	North America	USA	On Farm	Strawberry	Fruits	Perennial	-0.395896	-0.283126	0.112769
profit.18	Gleissmann et al. 1996	USA	North America	USA	On Farm	Strawberry	Fruits	Perennial	-0.393647	1.60108	1.99473
profit.2	Archer et al. 2007	USA	North America	USA	Experiment Station	Soybean	Oil crops	Annual	-1.28927	1.18958	2.47885
profit.2	Archer et al. 2007	USA	North America	USA	Experiment Station	Corn	Cereals	Annual	-1.22848	0.503104	1.73158
profit.2	Archer et al. 2007	USA	North America	USA	Experiment Station	Soybean	Oil crops	Annual	-1.11803	-0.241162	0.876868
profit.2	Archer et al. 2007	USA	North America	USA	Experiment Station	Corn	Cereals	Annual	-1.058	-0.595983	0.462014
profit.2	Archer et al. 2007	USA	North America	USA	Experiment Station	Wheat	Cereals	Annual	-0.831298	0.579818	1.41112
profit.2	Archer et al. 2007	USA	North America	USA	Experiment Station	Alfalfa	Forage	Annual/perennial	-0.260835	0.916291	1.17713
profit.20	Gundogmas et al.	Turkey	Europe	Europe	On Farm	Apricot	Fruits	Perennial	-0.120251	-0.10537	0.014881
profit.20	Gundogmas et al.	Turkey	Europe	Europe	On Farm	Apricot	Fruits	Perennial	-0.0914624	0.0410567	0.132519
profit.21	Gundogmas et al.	Turkey	Europe	Europe	On Farm	Figs	Fruits	Perennial	-0.0521701	0.0981251	0.150295
profit.21	Gundogmas et al.	Turkey	Europe	Europe	On Farm	Figs	Fruits	Perennial	-0.0521114	-0.248222	-0.19611
profit.22	Jacobsen et al. 2010	USA	North America	USA	Experiment Station	Squash	Vegetables	Annual	-0.0890648	NA	NA
profit.22	Jacobsen et al. 2010	USA	North America	USA	Experiment Station	Pepper	Vegetables	Annual	0.249744	NA	NA
profit.22	Jacobsen et al. 2010	USA	North America	USA	Experiment Station	Okra	Vegetables	Annual	0.432088	NA	NA
profit.22	Jacobsen et al. 2010	USA	North America	USA	Experiment Station	Corn	Cereals	Annual	1.64066	NA	NA
profit.23	Khakbazan et al. 2015	Canada	North America	NA	On Farm	Potato	Vegetables	Annual	-0.782097	NA	NA
profit.25	Zhang et al. 2015	China	Asia	NA	Survey	Soybean	Oil crops	Annual	-0.156569	NA	NA
profit.28	Mahoney et al. 2003	USA	North America	USA	Experiment Station	Corn	Cereals	Annual	-0.456167	-0.309188	0.146979
profit.28	Mahoney et al. 2003	USA	North America	USA	Experiment Station	Soybean	Oil crops	Annual	-0.358159	0.725937	1.0841
profit.28	Mahoney et al. 2003	USA	North America	USA	Experiment Station	Soybean	Oil crops	Annual	-0.172246	0.219054	0.391299
profit.28	Mahoney et al. 2003	USA	North America	USA	Experiment Station	Corn	Cereals	Annual	-0.127023	-0.210777	-0.083754
profit.28	Mahoney et al. 2003	USA	North America	USA	Experiment Station	Oat	Cereals	Annual	0	0.0384663	0.0384663
profit.28	Mahoney et al. 2003	USA	North America	USA	Experiment Station	Alfalfa	Forage	Annual/perennial	0.0173917	-0.143788	-0.16118
profit.29	McBride & Greene	USA	North America	USA	Survey	Soybean	Oil crops	Annual	-0.416147	NA	NA
profit.30	Mendoza	Philippines	Asia	NA	Survey	Rice	Cereals	Annual	-0.079806	NA	NA
profit.35	Ogbuchiekwe et al.	USA	North America	USA	Experiment Station	Cantaloupe	Fruits	Annual	-0.316273	-0.683198	-0.366925
profit.35	Ogbuchiekwe et al.	USA	North America	USA	Experiment Station	Lettuce	Vegetables	Annual	-0.223312	0.439481	0.662793
profit.37	Olgun et al.	Turkey	Europe	Europe	Survey	Cherry	Fruits	Perennial	-0.00501254	NA	NA
profit.39	Oplanic et al. 2009	Croatia	Europe	Europe	On Farm	Leek	Vegetables	Annual	-0.963861	0.268081	1.23194
profit.40	Pardo et al. 2009	Spain	Europe	Europe	Experiment Station	Wheat	Cereals	Annual	-0.487543	-0.54071	-0.0531677
profit.40	Pardo et al. 2009	Spain	Europe	Europe	Experiment Station	Barley	Cereals	Annual	-0.347178	-0.367846	-0.0206683
profit.43	Prabhaker et al. 2012	India	Asia	NA	Experiment Station	Onion	Vegetables	Annual	0.414015	NA	NA
profit.46	Rani et al. 2009	India	Asia	NA	Experiment Station	Wheat	Cereals	Annual	-0.349887	-2.10166	-1.75177
profit.46	Rani et al. 2009	India	Asia	NA	Experiment Station	Rice	Cereals	Annual	0.0237287	NA	NA
profit.48	Russo & Taylor	USA	North America	USA	Experiment Station	Corn	Cereals	Annual	-0.95132	-0.815186	0.136134
profit.48	Russo & Taylor	USA	North America	USA	Experiment Station	Cucumber	Vegetables	Annual	-0.526216	-1.33925	-0.813038
profit.48	Russo & Taylor	USA	North America	USA	Experiment Station	Pepper	Vegetables	Annual	-0.40639	-0.167189	0.239201
profit.5	Brumfield et al. 2000	USA	North America	USA	Experiment Station	Tomato	Vegetables	Annual	-0.20633	NA	NA
profit.5	Brumfield et al. 2000	USA	North America	USA	Experiment Station	Pumpkin	Vegetables	Annual	-0.17185	NA	NA
profit.5	Brumfield et al. 2000	USA	North America	USA	Experiment Station	Corn	Cereals	Annual	-0.160057	NA	NA
profit.50	Sellen et al. 1996	Canada	North America	NA	Experiment Station	Tomato	Vegetables	Annual	-0.595024	2.18214	2.77717
profit.50	Sellen et al. 1996	Canada	North America	NA	Experiment Station	Corn	Cereals	Annual	-0.512563	0.218347	0.730911
profit.50	Sellen et al. 1996	Canada	North America	NA	Experiment Station	Onion	Vegetables	Annual	-0.253242	1.11647	1.36971
profit.50	Sellen et al. 1996	Canada	North America	NA	Experiment Station	Cabbage	Vegetables	Annual	-0.214501	-0.202188	0.0123133
profit.50	Sellen et al. 1996	Canada	North America	NA	Experiment Station	Green beans	Vegetables	Annual	-0.101434	-0.916291	-0.814857
profit.52	Stonehouse et al.	Canada	North America	NA	Survey	Cereals	Cereals	Annual	-0.208959	-0.344377	-0.135418
profit.52	Stonehouse et al.	Canada	North America	NA	Survey	Corn	Cereals	Annual	0.0463762	-0.0152675	-0.0616436
profit.52	Stonehouse et al.	Canada	North America	NA	Survey	Bean	Pulses	Annual	0.245673	0.496437	0.250764
profit.53	Suja et al. 2011	India	Asia	NA	Experiment Station	Elephant foot yam	Vegetables	Annual	0.181761	0.201294	0.0195329
profit.54	Swezey et al.	USA	North America	USA	Experiment Station	Apple	Fruits	Perennial	0.210014	0.808217	0.598202
profit.57	Valkila	Nicaragua	South America	NA	Survey	Coffee	Beverage	Perennial	-0.441833	-0.829357	-0.387525
profit.7	Cavigelli et al. 2009	USA	North America	USA	Experiment Station	Corn	Cereals	Annual	-0.52932	0.121958	0.651279
profit.7	Cavigelli et al. 2009	USA	North America	USA	Experiment Station	Corn	Cereals	Annual	-0.369472	0.179528	0.549
profit.7	Cavigelli et al. 2009	USA	North America	USA	Experiment Station	Corn	Cereals	Annual	-0.265248	0.233963	0.499211
profit.7	Cavigelli et al. 2009	USA	North America	USA	Experiment Station	Soybean	Oil crops	Annual	-0.240916	0.241162	0.482078
profit.7	Cavigelli et al. 2009	USA	North America	USA	Experiment Station	Soybean	Oil crops	Annual	-0.213703	0.208156	0.421859
profit.7	Cavigelli et al. 2009	USA	North America	USA	Experiment Station	Soybean	Oil crops	Annual	-0.164593	0.167054	0.331648
profit.7	Cavigelli et al. 2009	USA	North America	USA	Experiment Station	Wheat	Cereals	Annual	-0.0645385	0.896926	0.961465
profit.7	Cavigelli et al. 2009	USA	North America	USA	Experiment Station	Wheat	Cereals	Annual	0.0257084	0.977399	0.95169
profit.8	Clark et al. 1999	USA	North America	USA	Experiment Station	Tomato	Vegetables	Annual	-0.191483	-0.248411	-0.0569279
profit.8	Clark et al. 1999	USA	North America	USA	Experiment Station	Tomato	Vegetables	Annual	-0.111218	-0.183303	-0.0720852
profit.8	Clark et al. 1999	USA	North America	USA	Experiment Station	Corn	Cereals	Annual	-0.105264	-0.128254	-0.0229903
profit.8	Clark et al. 1999	USA	North America	USA	Experiment Station	Bean	Pulses	Annual	0.0235305	0.0219789	-0.00155159
profit.8	Clark et al. 1999	USA	North America	USA	Experiment Station	Safflower	Oil crops	Annual	0.192991	-0.0540672	-0.247058
profit.9	Creamer et al. 2001	USA	North America	USA	Experiment Station	Tomato	Vegetables	Annual	-0.510169	-1.2299	-0.719729
yield.101	Helmers et al. 1986	USA	North America	USA	Experiment Station	Soybean	Oil crops	Annual	-0.105978	-0.0137577	0.0922203
yield.101	Helmers et al. 1986	USA	North America	USA	Experiment Station	Corn	Cereals	Annual	-0.0737754	-0.0208428	0.0529326
yield.101	Helmers et al. 1986	USA	North America	USA	Experiment Station	Oat	Cereals	Annual	0.0523699	0.178143	0.125773
yield.103	Herencia et al.	Spain	Europe	Europe	Experiment Station	Bean	Pulses	Annual	-0.451789	-0.952248	-0.500459
yield.103	Herencia et al.	Spain	Europe	Europe	Experiment Station	Tomato	Vegetables	Annual	-0.0833816	-0.0464203	0.0369613
yield.103	Herencia et al.	Spain	Europe	Europe	Experiment Station	Chard	Vegetables	Annual	-0.00126342	-0.214782	-0.213518
yield.103	Herencia et al.	Spain	Europe	Europe	Experiment Station	Pumpkin	Vegetables	Annual	0.138219	0.106356	-0.0318629
yield.11	Arncken et al.	Switzerland	Europe	Europe	Experiment Station	Wheat	Cereals	Annual	-0.71784	2.35579	3.07363
yield.114	Jansen et al 2015	Germany	Europe	Europe	Experiment Station	Lupin	Pulses	Annual	-0.184219	0.635989	0.820208
yield.115	Jarvan & Edesi	Estonia	Europe	Europe	Experiment Station	Potato	Root	Annual	-1.2852	-2.07944	-0.794243
yield.117	Jimenez et al.	Ecuador	South America	NA	On Farm	Banana	Fruits	Perennial	-0.5272	-0.48477	0.0424303
yield.118	Juroszek et al.	Taiwan	Asia	NA	On Farm	Tomato	Vegetables	Annual	-0.410366	-0.688937	-0.278571
yield.119	Kalinova et al 2011	Czech Republic	Europe	Europe	Experiment Station	Wheat	Cereals	Annual	-0.5383	0.395896	0.934196
yield.12	Arroyo et al. 2013	Spain	Europe	Europe	Experiment Station	Plum	Fruits	Perennial	-0.327051	0.0766829	0.403734
yield.123	Kaut et al.	Canada	North America	NA	Experiment Station	Wheat	Cereals	Annual	-0.262739	-1.72581	-1.46307
yield.126	Kirchmann et al.	Sweden	Europe	Europe	Experiment Station	Wheat	Cereals	Annual	-0.576106	-1.30649	-0.730383
yield.126	Kirchmann et al.	Sweden	Europe	Europe	Experiment Station	Barley	Cereals	Annual	-0.369097	0.0374673	0.406565
yield.127	Kitchen et al.	Australia	Australia	NA	On Farm	Wheat	Cereals	Annual	-0.391797	0.300964	0.692762
yield.132	Knudsen et al.	China	Asia	NA	Survey	Soybean	Oil crops	Annual	-0.100579	-0.0129872	0.0875915
yield.136	Kontopoulou et al 2015	Greece	Europe	Europe	Experiment Station	Bean	Pulses	Annual	-0.397166	-0.405465	-0.0082988
yield.138	Korsaeth et al.	Norway	Europe	Europe	Experiment Station	Oat	Cereals	Annual	-0.774343	0.269992	1.04434
yield.138	Korsaeth et al.	Norway	Europe	Europe	Experiment Station	Wheat	Cereals	Annual	-0.621067	-0.0597354	0.561331
yield.138	Korsaeth et al.	Norway	Europe	Europe	Experiment Station	Barley	Cereals	Annual	-0.512808	-0.111908	0.4009
yield.14	Asif et al. 2015	Canada	North America	NA	Experiment Station	Wheat	Cereals	Annual	-0.498339	NA	NA
yield.141	Larsen et al 2014	USA	North America	USA	Experiment Station	Corn	Cereals	Annual	-0.954363	0.389354	1.34372
yield.145	Liebhardt et al.	USA	North America	USA	Experiment Station	Corn	Cereals	Annual	-0.274802	0.134383	0.409185
yield.145	Liebhardt et al.	USA	North America	USA	Experiment Station	Soybean	Oil crops	Annual	0.174957	-0.357552	-0.532509
yield.147	Lin and Hulsbergen 2017	Germany	Europe	Europe	Experiment Station	Wheat	Cereals	Annual	-0.733969	NA	NA
yield.147	Lin and Hulsbergen 2017	Germany	Europe	Europe	Experiment Station	Potato	Vegetables	Annual	-0.484802	NA	NA
yield.149	Lo Scalzo et al 2013	Italy	Europe	Europe	On Farm	Cauliflower	Vegetables	Annual	-0.19938	-0.585727	-0.386347
yield.151	Lockeretz et al.	USA	North America	USA	On Farm	Corn	Cereals	Annual	-0.0811658	0.0308622	0.112028
yield.156	Lotter et al.	USA	North America	USA	Experiment Station	Soybean	Oil crops	Annual	-0.108575	0.542508	0.651083
yield.156	Lotter et al.	USA	North America	USA	Experiment Station	Corn	Cereals	Annual	0.0496566	-0.170395	-0.220052
yield.159	Lyngbaek et al.	Costa Rica	South America	NA	On Farm	Coffee	Beverage	Perennial	-0.249461	-0.129212	0.120249
yield.16	Bajgai et al. 2015	Australia	Australia	NA	Experiment Station	Corn	Cereals	Annual	0.0286881	0.0375044	0.00881626
yield.16	Bajgai et al. 2015	Australia	Australia	NA	Experiment Station	Cabbage	Vegetables	Annual	0.036814	0.390866	0.354052
yield.160	Macit et al.	Turkey	Europe	Europe	Experiment Station	Strawberry	Fruits	Annual	-0.0491119	-0.238798	-0.189686
yield.161	Mader et al.	Switzerland	Europe	Europe	Experiment Station	Potato	Root	Annual	-0.468708	0.0163997	0.485108
yield.161	Mader et al.	Switzerland	Europe	Europe	Experiment Station	Wheat	Cereals	Annual	-0.0800128	0.158642	0.238654
yield.162	Maggio et al.	Italy	Europe	Europe	Experiment Station	Potato	Root	Annual	-0.221869	-0.200832	0.0210364
yield.164	Malusa et al.	Italy	Europe	Europe	On Farm	Grapes	Fruits	Perennial	-0.267204	0.287682	0.554886
yield.167	Martinez-Eixarch et al 2017	Spain	Europe	Europe	On Farm	Rice	Cereals	Annual	-0.171861	-0.102708	0.0691525
yield.169	Martini et al.	USA	North America	USA	Experiment Station	Corn	Cereals	Annual	-0.279951	0.273757	0.553708
yield.169	Martini et al.	USA	North America	USA	Experiment Station	Tomato	Vegetables	Annual	0.235334	0.287682	0.0523484
yield.17	Ban et al.	Croatia	Europe	Europe	On Farm	Endive	Vegetables	Annual	-1.23037	-3.65674	-2.42637
yield.171	Mashele and Auerbach 2016	South Africa	Africa	NA	Experiment Station	Cowpea	Vegetables	Annual	-0.295773	NA	NA
yield.171	Mashele and Auerbach 2016	South Africa	Africa	NA	Experiment Station	Cabbage	Vegetables	Annual	-0.228018	NA	NA
yield.173	Mazzoncini et al.	Italy	Europe	Europe	Experiment Station	Sunflower	Oil crops	Annual	-0.769309	-0.519223	0.250085
yield.174	Mazzoncini et al.	Italy	Europe	Europe	Experiment Station	Wheat	Cereals	Annual	-0.812052	0.697139	1.50919
yield.177	Migliorini et al 2014	Italy	Europe	Europe	Survey	Wheat	Cereals	Annual	-0.223144	NA	NA
yield.182	Musyoka et al 2017	Kenya	Africa	NA	On Farm	Potato	Vegetables	Annual	-0.674151	-0.249147	0.425004
yield.182	Musyoka et al 2017	Kenya	Africa	NA	On Farm	Cabbage	Vegetables	Annual	-0.261766	-1.4321	-1.17034
yield.182	Musyoka et al 2017	Kenya	Africa	NA	On Farm	Corn	Cereals	Annual	0.162119	0.235363	0.0732443
yield.19	Behera et al.	India	Asia	NA	Experiment Station	Rice	Cereals	Annual	-0.64899	-0.629794	0.0191954
yield.19	Behera et al.	India	Asia	NA	Experiment Station	Pigeon Pea	Pulses	Annual	-0.150137	-0.660542	-0.510405
yield.190	Oroian et al 2017	Romania	Europe	Europe	On Farm	Peppermint	Oil crops	Perennial	-0.0106826	0.100083	0.110766
yield.196	Palmer et al. 2013	UK	Europe	Europe	Experiment Station	Potato	Vegetables	Annual	-0.253273	0	0.253273
yield.197	Patsiali et al. 2014	Greece	Europe	Europe	On Farm	Cotton	Fiber	Perennial	-0.016968	0.0637566	0.0807246
yield.198	Peck et al. 2010	USA	North America	USA	Experiment Station	Apple	Fruits	Perennial	0.0167135	-0.75521	-0.771924
yield.199	Perez-Romero et al. 2014	Spain	Europe	Europe	Experiment Station	Apricot	Fruits	Perennial	-1.51419	-1.38797	0.126218
yield.201	Pieper & Barrett	USA	North America	USA	On Farm	Tomato	Vegetables	Annual	-0.178514	-0.283944	-0.10543
yield.202	Polat et al.	Turkey	Europe	Europe	Experiment Station	Tomato	Vegetables	Annual	-0.0314366	-0.509666	-0.478229
yield.204	Porter et al. 2003	USA	North America	USA	Experiment Station	Soybean	Oil crops	Annual	-0.245473	0.675715	0.921188
yield.204	Porter et al. 2003	USA	North America	USA	Experiment Station	Alfalfa	Forage	Annual/perennial	-0.14449	-0.134685	0.00980468
yield.204	Porter et al. 2003	USA	North America	USA	Experiment Station	Oat	Cereals	Annual	-0.102279	-0.250477	-0.148198
yield.204	Porter et al. 2003	USA	North America	USA	Experiment Station	Corn	Cereals	Annual	0.380628	0.347394	-0.0332338
yield.205	Posner et al.	USA	North America	USA	On Farm	Soybean	Oil crops	Annual	-0.13101	1.7074	1.83841
yield.205	Posner et al.	USA	North America	USA	On Farm	Corn	Cereals	Annual	-0.123643	1.49124	1.61489
yield.208	Rader et al.	USA	North America	USA	On Farm	Peach	Fruits	Perennial	-0.329705	-0.269129	0.0605764
yield.210	Raupp	Germany	Europe	Europe	Experiment Station	Rye	Cereals	Annual	-0.00712417	-0.0818166	-0.0746924
yield.210	Raupp	Germany	Europe	Europe	Experiment Station	Potato	Root	Annual	0.00845566	-0.247184	-0.25564
yield.210	Raupp	Germany	Europe	Europe	Experiment Station	Beetroot	Root	Annual	0.0327136	0.609439	0.576726
yield.210	Raupp	Germany	Europe	Europe	Experiment Station	Carrot	Root	Annual	0.0619917	0.267488	0.205496
yield.214	Reganold et al. 2001	USA	North America	USA	On Farm	Apple	Fruits	Perennial	-0.0847965	NA	NA
yield.218	Riahi et al.	Tunisia	Africa	NA	Experiment Station	Tomato	Vegetables	Annual	-0.473671	0.534277	1.00795
yield.22	Benincasa et al. 2016	Italy	Europe	Europe	Experiment Station	Wheat	Cereals	Annual	-0.234812	0.249591	0.484403
yield.223	Ryan et al.	USA	North America	USA	Experiment Station	Soybean	Oil crops	Annual	-0.0921241	-0.136698	-0.0445735
yield.223	Ryan et al.	USA	North America	USA	Experiment Station	Corn	Cereals	Annual	-0.0422568	-0.109053	-0.0667964
yield.224	Sacco et al. 2015	Italy	Europe	Europe	Experiment Station	Wheat	Cereals	Annual	-0.132806	0.661517	0.794324
yield.224	Sacco et al. 2015	Italy	Europe	Europe	Experiment Station	Soybean	Oil crops	Annual	0.0158733	0.222231	0.206357
yield.227	Schneider et al. 2017	Bolivia	South America	NA	On Farm	Cacao	Other	Perennial	-0.51812	-1.24958	-0.731463
yield.230	Sellen et al. 1996	UK	Europe	Europe	Experiment Station	Tomato	Vegetables	Annual	-0.594922	2.18205	2.77697
yield.230	Sellen et al. 1996	UK	Europe	Europe	Experiment Station	Corn	Vegetables	Annual	-0.513107	0.215002	0.728109
yield.230	Sellen et al. 1996	UK	Europe	Europe	Experiment Station	Onion	Vegetables	Annual	-0.253531	1.1208	1.37433
yield.230	Sellen et al. 1996	UK	Europe	Europe	Experiment Station	Cabbage	Vegetables	Annual	-0.214526	-0.202151	0.0123747
yield.230	Sellen et al. 1996	UK	Europe	Europe	Experiment Station	Green beans	Vegetables	Annual	-0.101434	-0.908856	-0.807422
yield.239	Song et al.	China	Asia	NA	Experiment Station	Melon	Fruits	Annual	-0.0160288	1.3633	1.37933
yield.24	Benoit et al. 2016	France	Europe	Europe	On Farm	Wheat	Cereals	Annual	-0.659995	0.204794	0.864789
yield.246	Suja 2013	India	Asia	NA	Experiment Station	Yam	Vegetables	Annual	0.131574	0.237505	0.105931
yield.248	Suja et al. 2012	India	Asia	NA	Experiment Station	Elephant foot yam	Vegetables	Annual	0.181793	NA	NA
yield.249	Suja et al. 2017	India	Asia	NA	Experiment Station	Taro	Vegetables	Annual	-0.058136	NA	NA
yield.251	Swezey et al.	USA	North America	USA	On Farm	Cotton	Fiber	Perennial	-0.318454	0	0.318454
yield.252	Szafirowska et al.	Poland	Europe	Europe	Experiment Station	Pepper	Vegetables	Annual	0.390976	1.1472	0.756221
yield.253	Tamm et al.	Estonia	Europe	Europe	Experiment Station	Wheat	Cereals	Annual	-0.419059	-0.436442	-0.0173831
yield.253	Tamm et al.	Estonia	Europe	Europe	Experiment Station	Barley	Cereals	Annual	-0.29613	0.398803	0.694932
yield.253	Tamm et al.	Estonia	Europe	Europe	Experiment Station	Oat	Cereals	Annual	0.0204072	0.2043	0.183893
yield.257	Teasdale 2007	USA	North America	USA	Experiment Station	Corn	Cereals	Annual	-0.324464	NA	NA
yield.257	Teasdale 2007	USA	North America	USA	Experiment Station	Wheat	Cereals	Annual	-0.0128152	NA	NA
yield.260	Temple et al.	USA	North America	USA	On Farm	Safflower	Oil crops	Annual	-0.0974389	0.329041	0.42648
yield.260	Temple et al.	USA	North America	USA	On Farm	Corn	Cereals	Annual	-0.0857631	0.203575	0.289339
yield.260	Temple et al.	USA	North America	USA	On Farm	Bean	Pulses	Annual	0.000396275	0.460895	0.460499
yield.261	Torstensson et al.	Sweden	Europe	Europe	Experiment Station	Barley	Cereals	Annual	-0.752972	-0.359449	0.393522
yield.261	Torstensson et al.	Sweden	Europe	Europe	Experiment Station	Oat	Cereals	Annual	-0.457918	1.49307	1.95099
yield.263	Thorup-Kristensen et al. 2012	Denmark	Europe	Europe	Experiment Station	Onion	Vegetables	Annual	-0.353969	-0.525532	-0.171563
yield.263	Thorup-Kristensen et al. 2012	Denmark	Europe	Europe	Experiment Station	Rye	Cereals	Annual	-0.342664	NA	NA
yield.263	Thorup-Kristensen et al. 2012	Denmark	Europe	Europe	Experiment Station	Cabbage	Vegetables	Annual	-0.195249	0.298493	0.493742
yield.263	Thorup-Kristensen et al. 2012	Denmark	Europe	Europe	Experiment Station	Lettuce	Vegetables	Annual	-0.1814	-0.108634	0.0727665
yield.263	Thorup-Kristensen et al. 2012	Denmark	Europe	Europe	Experiment Station	Carrot	Vegetables	Annual	-0.102576	0.0387145	0.14129
yield.263	Thorup-Kristensen et al. 2012	Denmark	Europe	Europe	Experiment Station	Oat	Cereals	Annual	-0.0111733	NA	NA
yield.266	Temple et al.	USA	North America	USA	On Farm	Tomato	Vegetables	Annual	-0.19987	0.481087	0.680957
yield.268	Treadwell et al. 2008	USA	North America	USA	Experiment Station	Sweet potato	Vegetables	Annual	0.119834	NA	NA
yield.27	Bertschinger et al. 2004	Switzerland	Europe	Europe	On Farm	Apple	Fruits	Perennial	-0.158321	NA	NA
yield.272	Wang 2014	Taiwan	Asia	NA	Experiment Station	Broccoli	Vegetables	Annual	-0.302071	NA	NA
yield.272	Wang 2014	Taiwan	Asia	NA	Experiment Station	Amaranth	Vegetables	Annual	-0.275412	NA	NA
yield.272	Wang 2014	Taiwan	Asia	NA	Experiment Station	Water spinach	Vegetables	Annual	-0.099057	NA	NA
yield.272	Wang 2014	Taiwan	Asia	NA	Experiment Station	Rice	Cereals	Annual	-0.0669946	NA	NA
yield.272	Wang 2014	Taiwan	Asia	NA	Experiment Station	Corn	Cereals	Annual	-0.0408888	NA	NA
yield.275	Wang et al. 2008	USA	North America	USA	Experiment Station	Cantaloupe	Fruits	Annual	-0.159792	NA	NA
yield.275	Wang et al. 2008	USA	North America	USA	Experiment Station	Lettuce	Vegetables	Annual	-0.104625	NA	NA
yield.276	Warman & Havard	Canada	North America	NA	Experiment Station	Corn	Cereals	Annual	-0.193056	-0.355034	-0.161979
yield.276	Warman & Havard	Canada	North America	NA	Experiment Station	Potato	Root	Annual	-0.167335	-0.595839	-0.428504
yield.276	Warman & Havard	Canada	North America	NA	Experiment Station	Cabbage	Vegetables	Annual	-0.0162087	0.532934	0.549143
yield.276	Warman & Havard	Canada	North America	NA	Experiment Station	Carrot	Root	Annual	0.060274	0.199173	0.138899
yield.278	Welsh et al. 2009	Canada	North America	NA	Experiment Station	Wheat	Cereals	Annual	-0.795829	0.35074	1.14657
yield.279	Wheeler and Crisp	Australia	Australia	NA	On Farm	Grapes	Fruits	Perennial	-0.0918601	-0.0502555	0.0416046
yield.28	Besson et al.	Switzerland	Europe	Europe	Experiment Station	Barley	Cereals	Annual	-0.240716	-0.196967	0.0437489
yield.283	Wortman et al. 2013	USA	North America	USA	Experiment Station	Soybean	Pulses	Annual	-0.337401	NA	NA
yield.283	Wortman et al. 2013	USA	North America	USA	Experiment Station	Corn	Cereals	Annual	-0.145432	NA	NA
yield.283	Wortman et al. 2013	USA	North America	USA	Experiment Station	Wheat	Cereals	Annual	0.0462348	NA	NA
yield.29	Besson et al.	Switzerland	Europe	Europe	Experiment Station	Cabbage	Vegetables	Annual	-0.19563	0.10349	0.29912
yield.3	Alaru et al. 2014	Estonia	Europe	Europe	Experiment Station	Barley	Cereals	Annual	-0.559616	1.33072	1.89034
yield.3	Alaru et al. 2014	Estonia	Europe	Europe	Experiment Station	Wheat	Cereals	Annual	-0.393904	1.22723	1.62113
yield.3	Alaru et al. 2014	Estonia	Europe	Europe	Experiment Station	Potato	Vegetables	Annual	-0.276253	1.77886	2.05511
yield.3	Alaru et al. 2014	Estonia	Europe	Europe	Experiment Station	Pea	Pulses	Annual	-0.174353	0.0870114	0.261365
yield.30	Besson et al.	Switzerland	Europe	Europe	Experiment Station	Sugar beets	Other	Annual	-0.24318	-0.444163	-0.200983
yield.31	Bettiol et al. 2004	Brazil	South America	NA	Experiment Station	Tomato	Vegetables	Annual	-1.02156	0.81632	1.83788
yield.32	Bicanova et al.	Czech Republic	Europe	Europe	Experiment Station	Wheat	Cereals	Annual	-0.302407	0.190832	0.493239
yield.34	Bilsborrow et al. 2013	UK	Europe	Europe	Experiment Station	Wheat	Cereals	Annual	-0.496212	NA	NA
yield.35	Blaise et al.	India	Asia	NA	Experiment Station	Cotton	Fiber	Annual	0.102263	0.327213	0.22495
yield.38	Campanelli et al.	Italy	Europe	Europe	Experiment Station	Bean	Vegetables	Annual	-0.266635	-0.52997	-0.263335
yield.38	Campanelli et al.	Italy	Europe	Europe	Experiment Station	Lettuce	Vegetables	Annual	-0.126048	0.307525	0.433573
yield.38	Campanelli et al.	Italy	Europe	Europe	Experiment Station	Cauliflower	Vegetables	Annual	-0.0825606	0.000510979	0.0830716
yield.38	Campanelli et al.	Italy	Europe	Europe	Experiment Station	Melon	Fruits	Annual	-0.0395265	-0.742908	-0.703382
yield.38	Campanelli et al.	Italy	Europe	Europe	Experiment Station	Tomato	Vegetables	Annual	0.0392492	-0.106241	-0.14549
yield.38	Campanelli et al.	Italy	Europe	Europe	Experiment Station	Fennel	Vegetables	Annual	0.0641711	-0.0275114	-0.0916825
yield.39	Campiglia et al. 2015	Italy	Europe	Europe	Experiment Station	Wheat	Cereals	Annual	-0.172954	NA	NA
yield.42	Cavigelli et al.	USA	North America	USA	Experiment Station	Wheat	Cereals	Annual	-0.122218	-3.14782	-3.02561
yield.42	Cavigelli et al.	USA	North America	USA	Experiment Station	Soybean	Oil crops	Annual	-0.0594475	-0.397393	-0.337945
yield.42	Cavigelli et al.	USA	North America	USA	Experiment Station	Corn	Cereals	Annual	0.0445492	0.423941	0.379392
yield.46	Cicek et al. 2014	Canada	North America	NA	Experiment Station	Soybean	Oil crops	Annual	-0.235431	NA	NA
yield.46	Cicek et al. 2014	Canada	North America	NA	Experiment Station	Lentil	Pulses	N/A	-0.166497	NA	NA
yield.46	Cicek et al. 2014	Canada	North America	NA	Experiment Station	Pea	Cereals	Annual	-0.0583431	NA	NA
yield.47	Citak and Sonmez	Turkey	Europe	Europe	Experiment Station	Spinach	Vegetables	Annual	-0.765982	0.137201	0.903183
yield.48	Clark et al.	USA	North America	USA	Experiment Station	Corn	Cereals	Annual	-0.292532	0.462936	0.755468
yield.48	Clark et al.	USA	North America	USA	Experiment Station	Tomato	Vegetables	Annual	0.144748	0.43524	0.290491
yield.52	Coulter et al. 2011	USA	North America	USA	Experiment Station	Soybean	Oil crops	Annual	-0.273696	NA	NA
yield.52	Coulter et al. 2011	USA	North America	USA	Experiment Station	Corn	Cereals	Annual	-0.0915496	NA	NA
yield.52	Coulter et al. 2011	USA	North America	USA	Experiment Station	Alfalfa	Forage	Annual/perennial	0.151011	NA	NA
yield.56	Curuk et al.	Turkey	Europe	Europe	Experiment Station	Watermelon	Fruits	Annual	0.572373	-0.708337	-1.28071
yield.56	Curuk et al.	Turkey	Europe	Europe	Experiment Station	Melon	Fruits	Annual	0.62451	0.330607	-0.293902
yield.58	De Luca et al.	Italy	Europe	Europe	Experiment Station	Wheat	Cereals	Annual	-0.23679	0.0317487	0.268539
yield.58	De Luca et al.	Italy	Europe	Europe	Experiment Station	Tomato	Vegetables	Annual	-0.131996	1.27039	1.40238
yield.59	Delate & Cambardella	USA	North America	USA	Experiment Station	Corn	Cereals	Annual	-0.087906	-0.830348	-0.742442
yield.59	Delate & Cambardella	USA	North America	USA	Experiment Station	Soybean	Oil crops	Annual	-0.040822	-0.0289875	0.0118345
yield.6	Amarante et al.	Brazil	South America	NA	On Farm	Apple	Fruits	Perennial	1.58719	0.757566	-0.829621
yield.60	Delate et al.	USA	North America	USA	Experiment Station	Corn	Cereals	Annual	-0.0469805	-0.72678	-0.6798
yield.60	Delate et al.	USA	North America	USA	Experiment Station	Soybean	Oil crops	Annual	-5.81e-05	0.158094	0.158152
yield.61	Delmotte et al.	France	Europe	Europe	Survey	Rice	Cereals	Annual	-0.237562	0.266582	0.504144
yield.62	Demiryurek & Ceyhan	Turkey	Europe	Europe	Survey	Hazelnut	Other	Perennial	-0.0484479	0.61902	0.667468
yield.63	Denison et al. 2004	USA	North America	USA	Experiment Station	Corn	Cereals	Annual	-0.418216	NA	NA
yield.63	Denison et al. 2004	USA	North America	USA	Experiment Station	Tomato	Fruits	Annual	0.106038	NA	NA
yield.66	Dobbs & Smolik	USA	North America	USA	On Farm	Soybean	Oil crops	Annual	-0.2464	0.354545	0.600945
yield.66	Dobbs & Smolik	USA	North America	USA	On Farm	Corn	Cereals	Annual	-0.0522062	-0.306299	-0.254093
yield.67	Doltra et al.	Denmark	Europe	Europe	On Farm	Barley	Cereals	Annual	-0.743387	-0.203499	0.539888
yield.67	Doltra et al.	Denmark	Europe	Europe	On Farm	Barley	Cereals	Annual	-0.289064	0.18155	0.470614
yield.69	Doring et al. 2015	UK	Europe	Europe	On Farm	Wheat	Cereals	Annual	-0.562312	0.237113	0.799424
yield.7	Appireddy et al. 2008	India	Asia	NA	Experiment Station	Pepper	Vegetables	Annual	-0.247342	0.151659	0.399001
yield.72	Drinkwater et al. 2000	USA	North America	USA	Experiment Station	Corn	Cereals	Annual	0.273538	NA	NA
yield.74	Edgell et al. 2015	USA	North America	USA	Experiment Station	Sweet corn	Cereals	Annual	-1.15505	NA	NA
yield.76	Efthimiadou et al.	Greece	Europe	Europe	Experiment Station	Corn	Cereals	Annual	-0.13698	-0.689502	-0.552523
yield.78	Entz et al. 2005	Canada	North America	NA	Experiment Station	Flax	Oil crops	Annual	-0.500291	NA	NA
yield.80	Farneselli et al. 2015	Italy	Europe	Europe	Experiment Station	Melon	Fruits	Annual	-0.179409	NA	NA
yield.81	Farneselli et al. 2013	Italy	Europe	Europe	Experiment Station	Corn	Cereals	Annual	-0.234994	NA	NA
yield.81	Farneselli et al. 2013	Italy	Europe	Europe	Experiment Station	Tomato	Fruits	Annual	-0.0411369	NA	NA
yield.84	Gallaher and Snapp 2015	USA	North America	USA	Experiment Station	Soybean	Oil crops	Annual	0.0695933	-0.362905	-0.432499
yield.86	Gelfand et al. 2010	USA	North America	USA	Experiment Station	Wheat	Cereals	Annual	-0.546287	-0.587787	-0.0414997
yield.86	Gelfand et al. 2010	USA	North America	USA	Experiment Station	Corn	Cereals	Annual	-0.368855	-0.519875	-0.15102
yield.86	Gelfand et al. 2010	USA	North America	USA	Experiment Station	Soybean	Oil crops	Annual	0.0623903	-0.154151	-0.216541
yield.88	Gerdgikova	Bulgaria	Europe	Europe	Experiment Station	Pea grain	Vegetables	Annual	-0.148749	-0.418155	-0.269406
yield.91	Gopinath et al.	India	Asia	NA	Experiment Station	Wheat	Cereals	Annual	-0.581491	0.890315	1.47181
yield.92	Gosavi et al. 2009	India	Asia	NA	Experiment Station	Soybean	Oil crops	Annual	-0.297839	NA	NA
yield.92	Gosavi et al. 2009	India	Asia	NA	Experiment Station	Wheat	Cereals	Annual	-0.270757	NA	NA
yield.95	Guan et al. 2013	USA	North America	USA	Experiment Station	Melon	Fruits	Annual	-0.170958	NA	NA
yield.97	Halde et al. 2015	Canada	North America	NA	Experiment Station	Wheat	Cereals	Annual	-0.458308	NA	NA
yield.97	Halde et al. 2015	Canada	North America	NA	Experiment Station	Oat	Cereals	Annual	0.0363676	NA	NA
yield.99	Hargreaves et al. 2008	Canada	North America	NA	Experiment Station	Strawberry	Fruits	Perennial	0.326648	NA	NA

## Sheet: Profit
pub.id	study.name	country	continent	EU_US	study.type	crop	crop.type	annual.perennial	BCPRR	BCPsdRR	BCPcvRR	CostRR	CostsdRR	CostcvRR
profit.12	Delate et al. 2003	USA	North America	USA	Experiment Station	Corn	Cereals	Annual	0.847298	NA	NA	-0.375251	NA	NA
profit.12	Delate et al. 2003	USA	North America	USA	Experiment Station	Corn	Cereals	Annual	0.875469	NA	NA	-0.375251	NA	NA
profit.12	Delate et al. 2003	USA	North America	USA	Experiment Station	Soybean	Oil crops	Annual	1.12898	NA	NA	-0.113835	NA	NA
profit.12	Delate et al. 2003	USA	North America	USA	Experiment Station	Soybean	Oil crops	Annual	1.19234	NA	NA	-0.113835	NA	NA
profit.13	Delbridge et al. 2011	USA	North America	USA	Experiment Station	Oat	Cereals	Annual	0.265924	NA	NA	0.343533	0.722631	0.379098
profit.13	Delbridge et al. 2011	USA	North America	USA	Experiment Station	Soybean	Oil crops	Annual	0.595399	NA	NA	-0.157666	-1.83732	-1.67965
profit.13	Delbridge et al. 2011	USA	North America	USA	Experiment Station	Soybean	Oil crops	Annual	0.61274	NA	NA	-0.173586	-1.89805	-1.72446
profit.13	Delbridge et al. 2011	USA	North America	USA	Experiment Station	Corn	Cereals	Annual	0.691215	NA	NA	-0.0249956	-0.186199	-0.161204
profit.13	Delbridge et al. 2011	USA	North America	USA	Experiment Station	Corn	Cereals	Annual	0.771579	NA	NA	-0.132478	-0.244885	-0.112407
profit.14	Demiryurek & Ceyhan	Turkey	Europe	Europe	Survey	Hazelnut	Fruits	Perennial	0.103318	NA	NA	-0.0484479	-0.518452	-0.470004
profit.15	Eyhorn et al.	India	Asia	NA	Survey	Pepper	Vegetables	Annual	-0.338904	0.396881	0.735786	-0.468603	-1.78688	-1.31828
profit.15	Eyhorn et al.	India	Asia	NA	Survey	Soybean	Oil crops	Annual	-0.0379792	-0.0432968	-0.00531756	-0.0522944	-0.162899	-0.110605
profit.15	Eyhorn et al.	India	Asia	NA	Survey	Corn	Cereals	Annual	0.0675281	-0.183369	-0.250897	-0.0738462	0.790647	0.864493
profit.15	Eyhorn et al.	India	Asia	NA	Survey	Pigeon pea	Pulses	Annual	0.157156	-1.37845	-1.53561	-0.30929	-1.24075	-0.931458
profit.15	Eyhorn et al.	India	Asia	NA	Survey	Wheat	Cereals	Annual	0.183307	0.713556	0.530249	-0.209852	0.324667	0.53452
profit.15	Eyhorn et al.	India	Asia	NA	Survey	Sorghum	Cereals	Annual	0.245521	0.127513	-0.118008	-0.12748	1.56723	1.69471
profit.15	Eyhorn et al.	India	Asia	NA	Survey	Cotton	Fiber	Perennial	0.438722	0.219629	-0.219094	-0.180053	0.268692	0.448745
profit.17	Forster et al.	India	Asia	NA	Experiment Station	Wheat	Cereals	Annual	0.0559286	-0.465363	-0.521292	-0.222924	-0.0770334	0.14589
profit.17	Forster et al.	India	Asia	NA	Experiment Station	Cotton	Fiber	Perennial	0.223726	-0.944462	-1.16819	-0.414532	-1.19274	-0.77821
profit.17	Forster et al.	India	Asia	NA	Experiment Station	Soybean	Oil crops	Annual	0.428996	-0.0392207	-0.468216	-0.530611	-0.992128	-0.461517
profit.18	Gleissmann et al. 1996	USA	North America	USA	On Farm	Strawberry	Fruits	Perennial	0.075934	NA	NA	-0.0587668	0.156941	0.215707
profit.2	Archer et al. 2007	USA	North America	USA	Experiment Station	Corn	Cereals	Annual	-0.297252	NA	NA	0.0647511	-0.40576	-0.470511
profit.2	Archer et al. 2007	USA	North America	USA	Experiment Station	Corn	Cereals	Annual	-0.123614	NA	NA	0.0504648	-0.122555	-0.17302
profit.2	Archer et al. 2007	USA	North America	USA	Experiment Station	Wheat	Cereals	Annual	-0.0558805	NA	NA	0.0647511	-0.122555	-0.187306
profit.2	Archer et al. 2007	USA	North America	USA	Experiment Station	Soybean	Oil crops	Annual	0.104573	NA	NA	0.0647511	-0.122555	-0.187306
profit.2	Archer et al. 2007	USA	North America	USA	Experiment Station	Soybean	Oil crops	Annual	0.289892	NA	NA	0.0504648	-0.40576	-0.456225
profit.20	Gundogmas et al.	Turkey	Europe	Europe	On Farm	Apricot	Fruits	Perennial	0	0.236389	0.236389	-0.0180803	-0.212752	-0.194672
profit.21	Gundogmas et al.	Turkey	Europe	Europe	On Farm	Figs	Fruits	Perennial	0.00569802	0.367725	0.362027	0.0610111	0.77793	0.716919
profit.22	Jacobsen et al. 2010	USA	North America	USA	Experiment Station	Squash	Vegetables	Annual	0.356675	NA	NA	0.49416	NA	NA
profit.22	Jacobsen et al. 2010	USA	North America	USA	Experiment Station	Okra	Vegetables	Annual	1.46634	NA	NA	0.439762	NA	NA
profit.22	Jacobsen et al. 2010	USA	North America	USA	Experiment Station	Corn	Cereals	Annual	2.35042	NA	NA	0.494162	NA	NA
profit.28	Mahoney et al. 2003	USA	North America	USA	Experiment Station	Corn	Cereals	Annual	0.402224	NA	NA	-0.391595	-1.24026	-0.848668
profit.28	Mahoney et al. 2003	USA	North America	USA	Experiment Station	Soybean	Oil crops	Annual	0.619854	NA	NA	-0.120249	0.271153	0.391402
profit.28	Mahoney et al. 2003	USA	North America	USA	Experiment Station	Corn	Cereals	Annual	0.637103	NA	NA	-0.292442	-0.860201	-0.56776
profit.28	Mahoney et al. 2003	USA	North America	USA	Experiment Station	Oat	Cereals	Annual	0.753772	NA	NA	-0.266879	-0.754841	-0.487962
profit.28	Mahoney et al. 2003	USA	North America	USA	Experiment Station	Soybean	Oil crops	Annual	0.845187	NA	NA	-0.159542	-0.668367	-0.508826
profit.29	McBride & Greene	USA	North America	USA	Survey	Soybean	Oil crops	Annual	0.35775	NA	NA	0.20883	NA	NA
profit.3	Bachmann	Kyrgyzstan	Asia	NA	Survey	Cotton	Fiber	Perennial	0.737193	NA	NA	-0.549693	NA	NA
profit.30	Mendoza	Philippines	Asia	NA	Survey	Rice	Cereals	Annual	0.508901	NA	NA	-0.366783	NA	NA
profit.35	Ogbuchiekwe et al.	USA	North America	USA	Experiment Station	Lettuce	Vegetables	Annual	0.0645385	1.09861	1.03407	-0.145731	0.416427	0.562158
profit.35	Ogbuchiekwe et al.	USA	North America	USA	Experiment Station	Cantaloupe	Fruits	Annual	0.0709517	0.268264	0.197312	-0.102186	-0.155036	-0.0528495
profit.37	Olgun et al.	Turkey	Europe	Europe	Survey	Cherry	Fruits	Perennial	0.8727	NA	NA	0.184852	NA	NA
profit.39	Oplanic et al.	Croatia	Europe	Europe	On Farm	Leek	Vegetables	Annual	-0.197826	0.76214	0.959966	-0.0819171	0.401626	0.483543
profit.4	Berardi et al.	USA	North America	USA	Survey	Wheat	Cereals	Annual	-0.167793	NA	NA	0.340709	NA	NA
profit.40	Pardo et al.	Spain	Europe	Europe	Experiment Station	Wheat	Cereals	Annual	0.2204	0.300105	0.0797045	0.0831272	-0.0508723	-0.134
profit.40	Pardo et al.	Spain	Europe	Europe	Experiment Station	Barley	Cereals	Annual	0.361502	0.336472	-0.0250297	0.10372	-0.0951506	-0.19887
profit.43	Prabhakar. Et al.	India	Asia	NA	Experiment Station	Onion	Vegetables	Annual	0.165753	NA	NA	0.248751	NA	NA
profit.46	2009	India	Asia	NA	Experiment Station	Rice	Cereals	Annual	-0.387955	NA	NA	0.411507	NA	NA
profit.46	2009	India	Asia	NA	Experiment Station	Wheat	Cereals	Annual	-0.119216	0.737706	0.856922	0.219521	NA	NA
profit.47	2001	USA	North America	USA	On Farm	Apple	Fruits	Perennial	0.213574	0.332706	0.119132	0.0713609	-0.00873526	-0.0800961
profit.48	2006	USA	North America	USA	Experiment Station	Pepper	Vegetables	Annual	-0.00692044	0.392042	0.398963	0.236774	0.658046	0.421272
profit.48	2006	USA	North America	USA	Experiment Station	Cucumber	Vegetables	Annual	0.0653293	0.559616	0.494286	0.311305	0.894111	0.582806
profit.48	2006	USA	North America	USA	Experiment Station	Corn	Cereals	Annual	0.216486	0.653926	0.43744	0.142984	0.912952	0.769968
profit.5	Brumfield et al.	USA	North America	USA	Experiment Station	Tomato	Vegetables	Annual	-0.183019	NA	NA	0.237687	NA	NA
profit.5	Brumfield et al.	USA	North America	USA	Experiment Station	Corn	Cereals	Annual	-0.162281	NA	NA	0.263124	NA	NA
profit.5	Brumfield et al.	USA	North America	USA	Experiment Station	Pumpkin	Vegetables	Annual	-0.121078	NA	NA	0.208663	NA	NA
profit.50	1996	Canada	North America	NA	Experiment Station	Corn	Cereals	Annual	-0.664976	0.0588405	0.723817	0.157369	NA	NA
profit.50	1996	Canada	North America	NA	Experiment Station	Onion	Vegetables	Annual	-0.491823	0.788457	1.28028	0.2362	NA	NA
profit.50	1996	Canada	North America	NA	Experiment Station	Cabbage	Vegetables	Annual	-0.476924	-0.470004	0.00692044	0.261537	NA	NA
profit.50	1996	Canada	North America	NA	Experiment Station	Green beans	Vegetables	Annual	-0.401441	-1.20984	-0.808397	0.30199	NA	NA
profit.50	1996	Canada	North America	NA	Experiment Station	Tomato	Vegetables	Annual	-0.387527	2.35665	2.74418	-0.209021	NA	NA
profit.52	1996	Canada	North America	NA	Survey	Bean	Pulses	Annual	0.344221	NA	NA	-0.0387314	NA	NA
profit.52	1996	Canada	North America	NA	Survey	Cereals	Cereals	Annual	0.40973	NA	NA	-0.261245	NA	NA
profit.52	1996	Canada	North America	NA	Survey	Corn	Cereals	Annual	0.728239	NA	NA	-0.475288	NA	NA
profit.53	2012	India	Asia	NA	Experiment Station	Elephant foot Yam	Vegetables	Annual	0.0596383	0.065958	0.0063197	0.124388	NA	NA
profit.54	2007	USA	North America	USA	Experiment Station	Apple	Fruits	Perennial	0.243879	0.143101	-0.100779	0.153533	0.657596	0.504063
profit.55	2008	Turkey	Europe	Europe	Survey	Tomato	Vegetables	Annual	0.224977	NA	NA	0.599457	NA	NA
profit.57	2009	Nicaragua	South America	NA	Survey	Coffee	Beverage	Perennial	0	-0.847298	-0.847298	-0.247778	NA	NA
profit.7	Cavigelli et al. 2009	USA	North America	USA	Experiment Station	Corn	Cereals	Annual	0.553646	NA	NA	-0.0421188	NA	NA
profit.7	Cavigelli et al. 2009	USA	North America	USA	Experiment Station	Corn	Cereals	Annual	0.559616	NA	NA	-0.241224	NA	NA
profit.7	Cavigelli et al. 2009	USA	North America	USA	Experiment Station	Soybean	Oil crops	Annual	0.700165	NA	NA	-0.10166	NA	NA
profit.7	Cavigelli et al. 2009	USA	North America	USA	Experiment Station	Soybean	Oil crops	Annual	0.707133	NA	NA	-0.0847587	NA	NA
profit.7	Cavigelli et al. 2009	USA	North America	USA	Experiment Station	Soybean	Oil crops	Annual	0.731148	NA	NA	-0.0553988	NA	NA
profit.7	Cavigelli et al. 2009	USA	North America	USA	Experiment Station	Corn	Cereals	Annual	0.847298	NA	NA	-0.27092	NA	NA
profit.7	Cavigelli et al. 2009	USA	North America	USA	Experiment Station	Wheat	Cereals	Annual	1.02371	NA	NA	-0.351976	NA	NA
profit.7	Cavigelli et al. 2009	USA	North America	USA	Experiment Station	Wheat	Cereals	Annual	1.08128	NA	NA	-0.321205	NA	NA
profit.8	Clark et al. 1999	USA	North America	USA	Experiment Station	Tomato	Vegetables	Annual	-0.00634923	NA	NA	0.376119	1.12296	0.746838
profit.8	Clark et al. 1999	USA	North America	USA	Experiment Station	Tomato	Vegetables	Annual	-0.00634923	NA	NA	0.295023	1.0423	0.747276
profit.8	Clark et al. 1999	USA	North America	USA	Experiment Station	Corn	Cereals	Annual	0.0491902	NA	NA	0.082521	0.884923	0.802402
profit.8	Clark et al. 1999	USA	North America	USA	Experiment Station	Safflower	Oil crops	Annual	0.219214	NA	NA	0.257829	1.50247	1.24464
profit.8	Clark et al. 1999	USA	North America	USA	Experiment Station	Bean	Pulses	Annual	0.425904	NA	NA	-0.0589413	-0.289527	-0.230586
profit.9	Creamer et al. 2001	USA	North America	USA	Experiment Station	Tomato	Vegetables	Annual	0.49862	NA	NA	-0.873165	1.70776	2.58092
